# Supplementary material for: Investigation on SIW Slot Antenna Array with Beam Scanning Ability
Source: Hindawi journal article supplement (doi:10.1155/2019/8293624), 2019-01-06
Supplement: f1 [file 8293624.f1.pdf]

Figure 3(b)

|      |          |          |          |
|------|----------|----------|----------|
| -180 | -4.58634 | -12.0814 | -8.76178 |
| -179 | -4.597   | -12.1114 | -8.75197 |
| -178 | -4.65439 | -12.1975 | -8.79636 |
| -177 | -4.75913 | -12.3409 | -8.89563 |
| -176 | -4.91232 | -12.5435 | -9.05112 |
| -175 | -5.11567 | -12.8082 | -9.26493 |
| -174 | -5.37151 | -13.1389 | -9.54006 |
| -173 | -5.68298 | -13.5408 | -9.88049 |
| -172 | -6.05413 | -14.0204 | -10.2915 |
| -171 | -6.49021 | -14.5861 | -10.7797 |
| -170 | -6.99801 | -15.2486 | -11.3538 |
| -169 | -7.58636 | -16.0213 | -12.025  |
| -168 | -8.2669  | -16.9205 | -12.8073 |
| -167 | -9.05525 | -17.9649 | -13.7186 |
| -166 | -9.97294 | -19.1718 | -14.7809 |
| -165 | -11.0506 | -20.5451 | -16.0189 |
| -164 | -12.3336 | -22.0362 | -17.4522 |
| -163 | -13.8935 | -23.4464 | -19.0653 |
| -162 | -15.852  | -24.3019 | -20.7153 |
| -161 | -18.4415 | -24.0718 | -21.9387 |
| -160 | -22.1949 | -22.8426 | -22.0053 |
| -159 | -28.7844 | -21.1868 | -20.8079 |
| -158 | -35.1451 | -19.5131 | -19.0381 |
| -157 | -25.1843 | -17.9732 | -17.2416 |
| -156 | -20.2318 | -16.5976 | -15.6085 |
| -155 | -17.0839 | -15.3763 | -14.1686 |
| -154 | -14.794  | -14.2901 | -12.9049 |
| -153 | -13.0067 | -13.3197 | -11.7921 |
| -152 | -11.551  | -12.4485 | -10.8065 |
| -151 | -10.332  | -11.6625 | -9.92832 |
| -150 | -9.29126 | -10.9505 | -9.1418  |
| -149 | -8.39051 | -10.3031 | -8.4342  |
| -148 | -7.60309 | -9.7128  | -7.79526 |
| -147 | -6.90976 | -9.17313 | -7.21665 |
| -146 | -6.29615 | -8.67878 | -6.69152 |
| -145 | -5.75123 | -8.22522 | -6.21417 |
| -144 | -5.26633 | -7.80858 | -5.77982 |
| -143 | -4.83452 | -7.42549 | -5.3844  |
| -142 | -4.45014 | -7.07305 | -5.0244  |
| -141 | -4.10851 | -6.74865 | -4.6968  |
| -140 | -3.80571 | -6.45001 | -4.39895 |
| -139 | -3.5384  | -6.17507 | -4.12849 |
| -138 | -3.30374 | -5.92195 | -3.88333 |
| -137 | -3.09924 | -5.68896 | -3.66157 |
| -136 | -2.92271 | -5.47453 | -3.46151 |
| -135 | -2.77223 | -5.27721 | -3.28157 |
| -134 | -2.64608 | -5.09565 | -3.12028 |
| -133 | -2.5427  | -4.92856 | -2.9763  |
| -132 | -2.46067 | -4.77475 | -2.84833 |
| -131 | -2.39868 | -4.63308 | -2.73516 |
| -130 | -2.35552 | -4.50244 | -2.63563 |

-129 -2.33004 -4.3818 -2.54863  
-128 -2.32116 -4.27013 -2.47306  
-127 -2.32783 -4.16646 -2.40787  
-126 -2.34905 -4.06985 -2.35201  
-125 -2.38383 -3.97937 -2.30446  
-124 -2.43117 -3.89414 -2.2642  
-123 -2.4901 -3.81329 -2.23023  
-122 -2.55961 -3.73599 -2.20153  
-121 -2.63871 -3.66142 -2.17712  
-120 -2.72633 -3.58882 -2.156  
-119 -2.82142 -3.51743 -2.13718  
-118 -2.92284 -3.44655 -2.11969  
-117 -3.02944 -3.37549 -2.10257  
-116 -3.14 -3.30364 -2.08488  
-115 -3.25327 -3.23038 -2.06571  
-114 -3.36791 -3.15519 -2.04418  
-113 -3.48258 -3.07756 -2.01944  
-112 -3.59587 -2.99705 -1.99072  
-111 -3.70634 -2.91326 -1.95728  
-110 -3.81255 -2.82587 -1.91845  
-109 -3.91304 -2.73459 -1.87366  
-108 -4.0064 -2.63919 -1.8224  
-107 -4.09124 -2.5395 -1.76424  
-106 -4.16627 -2.4354 -1.69885  
-105 -4.23031 -2.32682 -1.626  
-104 -4.28229 -2.21376 -1.54554  
-103 -4.32133 -2.09622 -1.45741  
-102 -4.34671 -1.97429 -1.36164  
-101 -4.35794 -1.84807 -1.25835  
-100 -4.35472 -1.7177 -1.14771  
-99 -4.33698 -1.58335 -1.02998  
-98 -4.30486 -1.44522 -0.90546  
-97 -4.25867 -1.30352 -0.77451  
-96 -4.19892 -1.15848 -0.63751  
-95 -4.12628 -1.01035 -0.49488  
-94 -4.04152 -0.85938 -0.34707  
-93 -3.94551 -0.70585 -0.19452  
-92 -3.83919 -0.55001 -0.0377  
-91 -3.72352 -0.39213 0.12293  
-90 -3.59948 -0.23248 0.28694  
-89 -3.46805 -0.07131 0.45386  
-88 -3.33016 0.0911 0.62328  
-87 -3.1867 0.2545 0.79478  
-86 -3.03853 0.41866 0.96797  
-85 -2.88642 0.58331 1.14247  
-84 -2.73109 0.74824 1.31793  
-83 -2.5732 0.91322 1.49399  
-82 -2.41333 1.07802 1.67035  
-81 -2.25202 1.24243 1.8467  
-80 -2.08972 1.40625 2.02275  
-79 -1.92685 1.56928 2.19825  
-78 -1.76377 1.73134 2.37292  
-77 -1.60077 1.89223 2.54654  
-76 -1.43813 2.05179 2.71888

|     |          |         |         |
|-----|----------|---------|---------|
| -75 | -1.27607 | 2.20985 | 2.88972 |
| -74 | -1.11477 | 2.36623 | 3.05886 |
| -73 | -0.95439 | 2.52079 | 3.2261  |
| -72 | -0.79504 | 2.67337 | 3.39126 |
| -71 | -0.63681 | 2.82384 | 3.55415 |
| -70 | -0.47978 | 2.97205 | 3.71462 |
| -69 | -0.32398 | 3.11786 | 3.87249 |
| -68 | -0.16944 | 3.26116 | 4.02761 |
| -67 | -0.01615 | 3.40183 | 4.17981 |
| -66 | 0.1359   | 3.53975 | 4.32897 |
| -65 | 0.28675  | 3.6748  | 4.47492 |
| -64 | 0.43647  | 3.80691 | 4.61753 |
| -63 | 0.58511  | 3.93597 | 4.75668 |
| -62 | 0.73278  | 4.06189 | 4.89222 |
| -61 | 0.87958  | 4.18461 | 5.02403 |
| -60 | 1.02563  | 4.30404 | 5.15199 |
| -59 | 1.17108  | 4.42015 | 5.27599 |
| -58 | 1.31606  | 4.53287 | 5.39591 |
| -57 | 1.46076  | 4.64217 | 5.51165 |
| -56 | 1.60534  | 4.74803 | 5.62311 |
| -55 | 1.75     | 4.85042 | 5.7302  |
| -54 | 1.89493  | 4.94936 | 5.83283 |
| -53 | 2.04034  | 5.04484 | 5.93093 |
| -52 | 2.18644  | 5.13689 | 6.02442 |
| -51 | 2.33345  | 5.22556 | 6.11324 |
| -50 | 2.48158  | 5.31091 | 6.19736 |
| -49 | 2.63103  | 5.393   | 6.27671 |
| -48 | 2.782    | 5.47192 | 6.35129 |
| -47 | 2.93469  | 5.54778 | 6.42108 |
| -46 | 3.08927  | 5.6207  | 6.48607 |
| -45 | 3.24587  | 5.69081 | 6.54628 |
| -44 | 3.40464  | 5.75828 | 6.60173 |
| -43 | 3.56567  | 5.82328 | 6.65249 |
| -42 | 3.72902  | 5.88599 | 6.69861 |
| -41 | 3.89472  | 5.94661 | 6.74017 |
| -40 | 4.06275  | 6.00535 | 6.77728 |
| -39 | 4.23307  | 6.06244 | 6.81005 |
| -38 | 4.40557  | 6.11811 | 6.83864 |
| -37 | 4.58012  | 6.17259 | 6.86319 |
| -36 | 4.75652  | 6.22613 | 6.8839  |
| -35 | 4.93456  | 6.27895 | 6.90096 |
| -34 | 5.11396  | 6.3313  | 6.9146  |
| -33 | 5.29441  | 6.3834  | 6.92507 |
| -32 | 5.47557  | 6.43545 | 6.9326  |
| -31 | 5.65708  | 6.48765 | 6.93749 |
| -30 | 5.83851  | 6.54017 | 6.94002 |
| -29 | 6.01946  | 6.59315 | 6.94048 |
| -28 | 6.19948  | 6.64671 | 6.93918 |
| -27 | 6.3781   | 6.70093 | 6.93642 |
| -26 | 6.55487  | 6.75586 | 6.93253 |
| -25 | 6.72931  | 6.81151 | 6.92779 |
| -24 | 6.90095  | 6.86784 | 6.92251 |
| -23 | 7.06933  | 6.92479 | 6.91697 |
| -22 | 7.23398  | 6.98224 | 6.91143 |

|     |         |         |         |
|-----|---------|---------|---------|
| -21 | 7.39445 | 7.04005 | 6.90613 |
| -20 | 7.5503  | 7.09804 | 6.90128 |
| -19 | 7.70112 | 7.15599 | 6.89707 |
| -18 | 7.8465  | 7.21366 | 6.89364 |
| -17 | 7.98604 | 7.27076 | 6.89112 |
| -16 | 8.11938 | 7.32702 | 6.88957 |
| -15 | 8.24618 | 7.38212 | 6.88904 |
| -14 | 8.3661  | 7.43574 | 6.88952 |
| -13 | 8.47885 | 7.48755 | 6.891   |
| -12 | 8.58414 | 7.53722 | 6.89339 |
| -11 | 8.68172 | 7.58444 | 6.89661 |
| -10 | 8.77133 | 7.62889 | 6.90054 |
| -9  | 8.85278 | 7.67025 | 6.90504 |
| -8  | 8.92586 | 7.70826 | 6.90996 |
| -7  | 8.9904  | 7.74263 | 6.91513 |
| -6  | 9.04626 | 7.77312 | 6.9204  |
| -5  | 9.09329 | 7.79953 | 6.9256  |
| -4  | 9.13139 | 7.82165 | 6.93057 |
| -3  | 9.16047 | 7.83934 | 6.93519 |
| -2  | 9.18046 | 7.85246 | 6.93932 |
| -1  | 9.19132 | 7.86092 | 6.94287 |
| 0   | 9.193   | 7.86466 | 6.94575 |
| 1   | 9.18551 | 7.86366 | 6.94793 |
| 2   | 9.16886 | 7.85792 | 6.94936 |
| 3   | 9.14307 | 7.8475  | 6.95007 |
| 4   | 9.10821 | 7.83247 | 6.95007 |
| 5   | 9.06433 | 7.81295 | 6.94944 |
| 6   | 9.01154 | 7.78907 | 6.94824 |
| 7   | 8.94995 | 7.76102 | 6.94659 |
| 8   | 8.8797  | 7.72899 | 6.94459 |
| 9   | 8.80095 | 7.69323 | 6.9424  |
| 10  | 8.71387 | 7.65397 | 6.94014 |
| 11  | 8.61867 | 7.6115  | 6.93796 |
| 12  | 8.51559 | 7.56611 | 6.93599 |
| 13  | 8.40486 | 7.5181  | 6.93438 |
| 14  | 8.28676 | 7.4678  | 6.93324 |
| 15  | 8.16159 | 7.41551 | 6.93267 |
| 16  | 8.02967 | 7.36156 | 6.93274 |
| 17  | 7.89135 | 7.30625 | 6.93352 |
| 18  | 7.747   | 7.24991 | 6.93502 |
| 19  | 7.59699 | 7.19281 | 6.93723 |
| 20  | 7.44175 | 7.13523 | 6.9401  |
| 21  | 7.28171 | 7.07742 | 6.94356 |
| 22  | 7.11731 | 7.01959 | 6.9475  |
| 23  | 6.94902 | 6.96193 | 6.95176 |
| 24  | 6.77731 | 6.90459 | 6.95618 |
| 25  | 6.60268 | 6.84769 | 6.96055 |
| 26  | 6.42561 | 6.79132 | 6.96464 |
| 27  | 6.2466  | 6.73551 | 6.96822 |
| 28  | 6.06615 | 6.68026 | 6.97101 |
| 29  | 5.88474 | 6.62555 | 6.97275 |
| 30  | 5.70285 | 6.5713  | 6.97314 |
| 31  | 5.52094 | 6.51741 | 6.97191 |
| 32  | 5.33943 | 6.46375 | 6.96877 |

|    |          |         |         |
|----|----------|---------|---------|
| 33 | 5.15875  | 6.41017 | 6.96344 |
| 34 | 4.97927  | 6.35648 | 6.95565 |
| 35 | 4.80132  | 6.3025  | 6.94512 |
| 36 | 4.62521  | 6.248   | 6.93162 |
| 37 | 4.45121  | 6.19278 | 6.9149  |
| 38 | 4.27951  | 6.1366  | 6.89474 |
| 39 | 4.11028  | 6.07923 | 6.87094 |
| 40 | 3.94365  | 6.02045 | 6.84331 |
| 41 | 3.77968  | 5.96004 | 6.81169 |
| 42 | 3.61841  | 5.89778 | 6.77593 |
| 43 | 3.45981  | 5.83346 | 6.73589 |
| 44 | 3.30382  | 5.76689 | 6.69146 |
| 45 | 3.15037  | 5.69789 | 6.64256 |
| 46 | 2.99931  | 5.62629 | 6.58911 |
| 47 | 2.85049  | 5.55194 | 6.53104 |
| 48 | 2.70375  | 5.4747  | 6.46831 |
| 49 | 2.55887  | 5.39446 | 6.4009  |
| 50 | 2.41566  | 5.3111  | 6.32879 |
| 51 | 2.27389  | 5.22454 | 6.25198 |
| 52 | 2.13334  | 5.1347  | 6.17048 |
| 53 | 1.99378  | 5.04154 | 6.08432 |
| 54 | 1.85499  | 4.945   | 5.99352 |
| 55 | 1.71673  | 4.84506 | 5.89814 |
| 56 | 1.57881  | 4.74171 | 5.79822 |
| 57 | 1.44102  | 4.63494 | 5.69384 |
| 58 | 1.30316  | 4.52478 | 5.58505 |
| 59 | 1.16505  | 4.41123 | 5.47193 |
| 60 | 1.02652  | 4.29433 | 5.35457 |
| 61 | 0.88743  | 4.17414 | 5.23306 |
| 62 | 0.74762  | 4.0507  | 5.10748 |
| 63 | 0.60698  | 3.92408 | 4.97795 |
| 64 | 0.46541  | 3.79435 | 4.84456 |
| 65 | 0.32279  | 3.66159 | 4.70742 |
| 66 | 0.17907  | 3.5259  | 4.56665 |
| 67 | 0.03419  | 3.38735 | 4.42237 |
| 68 | -0.11191 | 3.24607 | 4.27469 |
| 69 | -0.25925 | 3.10216 | 4.12375 |
| 70 | -0.40783 | 2.95573 | 3.96967 |
| 71 | -0.55764 | 2.80691 | 3.81258 |
| 72 | -0.70864 | 2.65582 | 3.65264 |
| 73 | -0.86079 | 2.50261 | 3.48999 |
| 74 | -1.01401 | 2.34741 | 3.32477 |
| 75 | -1.16818 | 2.19037 | 3.15715 |
| 76 | -1.32319 | 2.03164 | 2.98729 |
| 77 | -1.47886 | 1.87139 | 2.81536 |
| 78 | -1.635   | 1.70979 | 2.64155 |
| 79 | -1.79138 | 1.547   | 2.46604 |
| 80 | -1.94773 | 1.38321 | 2.28905 |
| 81 | -2.10372 | 1.21862 | 2.11078 |
| 82 | -2.25898 | 1.05341 | 1.93146 |
| 83 | -2.41311 | 0.88779 | 1.75133 |
| 84 | -2.56561 | 0.72198 | 1.57066 |
| 85 | -2.71597 | 0.55619 | 1.38972 |
| 86 | -2.86358 | 0.39067 | 1.2088  |

|     |          |          |          |
|-----|----------|----------|----------|
| 87  | -3.0078  | 0.22564  | 1.02821  |
| 88  | -3.14789 | 0.06135  | 0.84828  |
| 89  | -3.28309 | -0.10194 | 0.66938  |
| 90  | -3.41257 | -0.26396 | 0.49188  |
| 91  | -3.53546 | -0.42446 | 0.31616  |
| 92  | -3.65082 | -0.58316 | 0.14266  |
| 93  | -3.75775 | -0.73978 | -0.02819 |
| 94  | -3.8553  | -0.89405 | -0.19593 |
| 95  | -3.94256 | -1.04567 | -0.3601  |
| 96  | -4.01866 | -1.19439 | -0.52021 |
| 97  | -4.08279 | -1.33991 | -0.67578 |
| 98  | -4.13426 | -1.48199 | -0.8263  |
| 99  | -4.1725  | -1.62038 | -0.97131 |
| 100 | -4.19708 | -1.75483 | -1.11032 |
| 101 | -4.20775 | -1.88514 | -1.2429  |
| 102 | -4.20446 | -2.01111 | -1.36862 |
| 103 | -4.18736 | -2.13259 | -1.48712 |
| 104 | -4.1568  | -2.24945 | -1.59808 |
| 105 | -4.11332 | -2.36162 | -1.70124 |
| 106 | -4.05768 | -2.46903 | -1.79642 |
| 107 | -3.99077 | -2.57171 | -1.88352 |
| 108 | -3.91367 | -2.66971 | -1.96253 |
| 109 | -3.82756 | -2.76313 | -2.03354 |
| 110 | -3.73371 | -2.85215 | -2.09673 |
| 111 | -3.63347 | -2.93698 | -2.15238 |
| 112 | -3.52825 | -3.01791 | -2.20089 |
| 113 | -3.41943 | -3.09527 | -2.24274 |
| 114 | -3.30844 | -3.16948 | -2.27849 |
| 115 | -3.19667 | -3.24097 | -2.30882 |
| 116 | -3.08548 | -3.31027 | -2.33445 |
| 117 | -2.9762  | -3.37792 | -2.35621 |
| 118 | -2.8701  | -3.44454 | -2.37495 |
| 119 | -2.76842 | -3.51078 | -2.3916  |
| 120 | -2.67234 | -3.57733 | -2.40711 |
| 121 | -2.583   | -3.64493 | -2.42248 |
| 122 | -2.5015  | -3.71435 | -2.43872 |
| 123 | -2.42891 | -3.78638 | -2.45688 |
| 124 | -2.36625 | -3.86185 | -2.47798 |
| 125 | -2.31454 | -3.94162 | -2.5031  |
| 126 | -2.27476 | -4.02658 | -2.53329 |
| 127 | -2.24792 | -4.11761 | -2.56962 |
| 128 | -2.23499 | -4.21567 | -2.61317 |
| 129 | -2.23699 | -4.32171 | -2.665   |
| 130 | -2.25493 | -4.43672 | -2.72621 |
| 131 | -2.2899  | -4.5617  | -2.79789 |
| 132 | -2.34299 | -4.69773 | -2.88116 |
| 133 | -2.41539 | -4.84588 | -2.97715 |
| 134 | -2.50835 | -5.00729 | -3.08703 |
| 135 | -2.62323 | -5.18316 | -3.21201 |
| 136 | -2.76151 | -5.37474 | -3.35336 |
| 137 | -2.92481 | -5.58337 | -3.51238 |
| 138 | -3.11495 | -5.81045 | -3.69048 |
| 139 | -3.33396 | -6.05752 | -3.88914 |
| 140 | -3.58415 | -6.32621 | -4.10998 |

141 -3.86814 -6.61834 -4.35473  
142 -4.18899 -6.93587 -4.6253  
143 -4.55028 -7.281 -4.92379  
144 -4.95622 -7.65616 -5.25255  
145 -5.41189 -8.06412 -5.61421  
146 -5.92346 -8.50801 -6.01176  
147 -6.49854 -8.9914 -6.4486  
148 -7.14674 -9.51845 -6.92865  
149 -7.88039 -10.094 -7.45648  
150 -8.71575 -10.7236 -8.03738  
151 -9.67488 -11.4141 -8.67762  
152 -10.7888 -12.1732 -9.38451  
153 -12.1034 -13.0104 -10.1667  
154 -13.6901 -13.9362 -11.034  
155 -15.6704 -14.9629 -11.9974  
156 -18.276 -16.1025 -13.068  
157 -22.0399 -17.3631 -14.2534  
158 -28.6944 -18.7387 -15.5494  
159 -36.5496 -20.1834 -16.9191  
160 -25.4538 -21.5583 -18.2496  
161 -20.3864 -22.5719 -19.2969  
162 -17.2195 -22.8637 -19.7243  
163 -14.9361 -22.3375 -19.3669  
164 -13.1668 -21.2818 -18.424  
165 -11.7366 -20.0474 -17.2323  
166 -10.5489 -18.8381 -16.0211  
167 -9.54515 -17.7342 -14.8933  
168 -8.68702 -16.756 -13.8815  
169 -7.94824 -15.9005 -12.9889  
170 -7.31007 -15.1578 -12.2079  
171 -6.75874 -14.5166 -11.5286  
172 -6.28391 -13.9665 -10.9409  
173 -5.87769 -13.4988 -10.4362  
174 -5.53401 -13.1062 -10.0072  
175 -5.24815 -12.7829 -9.64777  
176 -5.01648 -12.5245 -9.35325  
177 -4.83622 -12.3273 -9.11986  
178 -4.70531 -12.1887 -8.94473  
179 -4.62232 -12.1071 -8.82582  
180 -4.58634 -12.0814 -8.76178

Figure5(b)

|      |          |          |          |          |
|------|----------|----------|----------|----------|
| 13.4 | -15.9005 | -0.30953 | -0.30953 | -15.5489 |
| 13.5 | -18.0266 | -0.26194 | -0.26194 | -17.6042 |
| 13.6 | -20.9177 | -0.22357 | -0.22357 | -20.3298 |
| 13.7 | -25.1307 | -0.19779 | -0.19779 | -24.1207 |
| 13.8 | -31.7115 | -0.18453 | -0.18453 | -29.2783 |
| 13.9 | -31.7856 | -0.18232 | -0.18232 | -30.1516 |
| 14   | -25.8046 | -0.18911 | -0.18911 | -25.4942 |
| 14.1 | -22.1597 | -0.20266 | -0.20266 | -22.0419 |
| 14.2 | -19.7796 | -0.22078 | -0.22078 | -19.6966 |
| 14.3 | -18.1055 | -0.24149 | -0.24149 | -18.024  |
| 14.4 | -16.878  | -0.26316 | -0.26316 | -16.7861 |
| 14.5 | -15.9557 | -0.28455 | -0.28455 | -15.8468 |
| 14.6 | -15.2502 | -0.30484 | -0.30484 | -15.1199 |
| 14.7 | -14.699  | -0.32367 | -0.32367 | -14.545  |
| 14.8 | -14.2537 | -0.34109 | -0.34109 | -14.076  |
| 14.9 | -13.8748 | -0.35757 | -0.35757 | -13.6755 |
| 15   | -13.5298 | -0.37396 | -0.37396 | -13.3119 |
| 15.1 | -13.1936 | -0.3914  | -0.3914  | -12.9594 |
| 15.2 | -12.8498 | -0.4113  | -0.4113  | -12.5982 |



Figure7(a)

|      |          |          |          |
|------|----------|----------|----------|
| -180 | -30.3597 | -35.1458 | -32.6431 |
| -179 | -29.353  | -34.7884 | -31.8778 |
| -178 | -33.1976 | -39.2532 | -31.5079 |
| -177 | -30.8376 | -41.264  | -31.4425 |
| -176 | -31.8675 | -43.4564 | -31.5965 |
| -175 | -31.3497 | -44.645  | -31.8859 |
| -174 | -31.8995 | -41.4654 | -32.2374 |
| -173 | -33.7192 | -44.897  | -32.6084 |
| -172 | -32.5556 | -42.6498 | -33.0035 |
| -171 | -32.3733 | -43.9745 | -33.4698 |
| -170 | -31.2584 | -41.4654 | -34.0731 |
| -169 | -29.4022 | -44.654  | -34.8676 |
| -168 | -30.8873 | -40.4989 | -35.8665 |
| -167 | -30.1372 | -39.4985 | -37.0081 |
| -166 | -30.6876 | -33.546  | -38.1283 |
| -165 | -35.566  | -38.456  | -39.0131 |
| -164 | -36.7532 | -39.345  | -39.5977 |
| -163 | -36.8865 | -43.64   | -40.1153 |
| -162 | -37.9468 | -44.6454 | -40.9936 |
| -161 | -40.0498 | -48.5146 | -42.7659 |
| -160 | -43.3125 | -46.645  | -46.2866 |
| -159 | -39.2351 | -40.6432 | -51.6088 |
| -158 | -33.3859 | -38.9636 | -46.2663 |
| -157 | -31.2455 | -34.2297 | -40.3631 |
| -156 | -30.9707 | -49.6832 | -36.5708 |
| -155 | -29.2537 | -47.0824 | -33.964  |
| -154 | -28.6939 | -38.6636 | -32.1293 |
| -153 | -29.1785 | -38.2444 | -30.8686 |
| -152 | -29.8043 | -38.2082 | -30.0772 |
| -151 | -29.2636 | -35.6136 | -29.698  |
| -150 | -30.0803 | -35.1917 | -29.7028 |
| -149 | -28.1442 | -31.8044 | -30.0849 |
| -148 | -30.4748 | -33.3249 | -30.8569 |
| -147 | -30.1309 | -31.8161 | -32.0534 |
| -146 | -30.8397 | -32.546  | -33.7376 |
| -145 | -32.531  | -33.3139 | -36.0133 |
| -144 | -29.9188 | -33.2542 | -39.0243 |
| -143 | -32.6833 | -38.3265 | -42.7729 |
| -142 | -32.7085 | -34.9605 | -45.7629 |
| -141 | -31.7516 | -39.8374 | -44.9534 |
| -140 | -33.9655 | -40.2372 | -42.7195 |
| -139 | -33.9888 | -39.6313 | -40.9584 |
| -138 | -33.8694 | -49.4208 | -39.5716 |
| -137 | -36.2475 | -40.0311 | -38.1671 |
| -136 | -30.3983 | -45.2215 | -36.5012 |
| -135 | -29.9474 | -42.138  | -34.6087 |
| -134 | -28.3412 | -38.5996 | -32.674  |
| -133 | -26.9204 | -38.4628 | -30.8538 |
| -132 | -26.1127 | -40.0856 | -29.2263 |
| -131 | -25.7745 | -37.2207 | -27.8151 |
| -130 | -24.95   | -39.0029 | -26.6166 |

-129 -24.5539 -44.7193 -25.6166  
-128 -25.772 -54.1749 -24.7981  
-127 -26.2821 -43.5813 -24.1441  
-126 -25.3181 -44.6486 -23.639  
-125 -25.4789 -38.6224 -23.2686  
-124 -26.1691 -39.4411 -23.02  
-123 -26.5142 -37.1867 -22.8816  
-122 -26.7961 -35.2424 -22.8425  
-121 -27.0443 -37.068 -22.8921  
-120 -26.4847 -34.1705 -23.02  
-119 -25.6919 -31.8465 -23.2156  
-118 -25.8483 -33.625 -23.4677  
-117 -26.5143 -33.804 -23.7641  
-116 -27.0831 -33.3983 -24.0917  
-115 -27.1936 -33.0946 -24.4361  
-114 -28.3719 -34.0443 -24.7816  
-113 -29.5482 -35.2194 -25.1124  
-112 -27.3282 -34.0006 -25.4126  
-111 -28.551 -34.5181 -25.6682  
-110 -28.9486 -35.1973 -25.8679  
-109 -29.0847 -34.3628 -26.0045  
-108 -29.1636 -33.0456 -26.0755  
-107 -30.0211 -33.175 -26.083  
-106 -30.0758 -33.626 -26.0325  
-105 -30.0537 -33.2349 -25.9319  
-104 -30.4645 -33.2248 -25.7902  
-103 -28.7435 -32.6456 -25.616  
-102 -29.4129 -32.7234 -25.4173  
-101 -28.7574 -33.6909 -25.2009  
-100 -28.4467 -32.7419 -24.9724  
-99 -29.052 -32.3782 -24.736  
-98 -28.3838 -32.4994 -24.4953  
-97 -30.7647 -33.2695 -24.2529  
-96 -29.5444 -33.5746 -24.0109  
-95 -28.1604 -33.6749 -23.7712  
-94 -28.1316 -33.5057 -23.5352  
-93 -31.0401 -34.481 -23.3044  
-92 -35.5856 -34.6917 -23.0801  
-91 -35.0114 -35.713 -22.8636  
-90 -35.784 -36.1634 -22.6566  
-89 -37.5079 -37.5116 -22.4603  
-88 -29.3976 -37.2255 -22.2766  
-87 -29.8432 -37.7514 -22.107  
-86 -38.0737 -37.8514 -21.9536  
-85 -31.6794 -39.4775 -21.8182  
-84 -32.6326 -40.3164 -21.7028  
-83 -28.7895 -41.1785 -21.6095  
-82 -28.4085 -40.4819 -21.5404  
-81 -27.2326 -39.278 -21.4973  
-80 -31.4993 -39.9468 -21.482  
-79 -31.0947 -45.7273 -21.4956  
-78 -26.8956 -39.652 -21.5388  
-77 -27.646 -40.9878 -21.611  
-76 -31.5685 -41.5877 -21.7099

-75 -27.8003 -40.3331 -21.8311  
-74 -28.8401 -41.5095 -21.9667  
-73 -30.6641 -43.8533 -22.105  
-72 -31.0201 -42.3855 -22.2295  
-71 -30.7635 -45.1758 -22.3192  
-70 -30.3133 -44.0802 -22.3503  
-69 -26.0336 -44.1484 -22.3001  
-68 -24.5918 -40.3095 -22.1523  
-67 -24.0085 -42.5023 -21.9022  
-66 -22.6057 -38.7086 -21.5596  
-65 -20.9787 -41.2942 -21.1466  
-64 -20.2797 -43.272 -20.6937  
-63 -21.883 -43.1394 -20.2334  
-62 -21.1311 -43.7055 -19.7973  
-61 -21.2697 -42.5344 -19.4132  
-60 -18.7848 -38.1529 -19.1059  
-59 -19.1781 -38.3273 -18.8977  
-58 -18.8877 -40.3469 -18.8105  
-57 -18.8264 -38.5537 -18.8676  
-56 -19.3788 -36.7937 -19.0962  
-55 -27.0214 -37.1592 -19.5317  
-54 -30.0877 -38.2682 -20.2234  
-53 -26.7697 -37.3266 -21.2457  
-52 -20.8252 -35.1298 -22.7207  
-51 -22.3596 -37.7864 -24.8693  
-50 -20.8268 -33.4097 -28.1365  
-49 -20.5207 -33.2737 -33.2472  
-48 -19.1709 -37.7697 -34.6826  
-47 -18.0728 -37.4011 -28.7631  
-46 -17.2207 -35.9966 -24.5398  
-45 -16.8611 -37.7525 -21.6624  
-44 -16.078 -38.0238 -19.5896  
-43 -16.2895 -35.6403 -18.0639  
-42 -15.3252 -32.9526 -16.9551  
-41 -15.6628 -40.7359 -16.1941  
-40 -15.1629 -35.2844 -15.7463  
-39 -15.0859 -31.1183 -15.5996  
-38 -15.8122 -34.0302 -15.7605  
-37 -15.9682 -36.7537 -16.2547  
-36 -15.4527 -34.605 -17.1332  
-35 -16.9537 -32.0016 -18.4857  
-34 -17.726 -30.3028 -20.4697  
-33 -17.7838 -27.4416 -23.3587  
-32 -18.6734 -29.918 -27.4154  
-31 -20.9663 -30.0109 -29.9891  
-30 -22.179 -32.6805 -26.5503  
-29 -23.8898 -33.1837 -22.9692  
-28 -24.6547 -27.8291 -20.5773  
-27 -25.0193 -27.1112 -19.0646  
-26 -23.0219 -31.0766 -18.2066  
-25 -22.2156 -31.3598 -17.8763  
-24 -19.7884 -35.6945 -17.9865  
-23 -17.8755 -33.4238 -18.4303  
-22 -17.7475 -30.8274 -18.9988

|     |          |          |          |
|-----|----------|----------|----------|
| -21 | -16.3548 | -34.4765 | -19.309  |
| -20 | -14.9835 | -33.1247 | -18.9702 |
| -19 | -15.1381 | -30.4713 | -18.0109 |
| -18 | -14.6313 | -29.811  | -16.8477 |
| -17 | -15.2317 | -27.8276 | -15.8603 |
| -16 | -15.6734 | -29.284  | -15.2599 |
| -15 | -18.8042 | -28.269  | -15.1696 |
| -14 | -22.8196 | -27.522  | -15.7047 |
| -13 | -40.3952 | -25.5637 | -17.0009 |
| -12 | -23.3947 | -24.0803 | -19.0081 |
| -11 | -17.4586 | -24.3996 | -19.9902 |
| -10 | -13.2275 | -25.7557 | -17.1283 |
| -9  | -10.3919 | -25.7042 | -13.1649 |
| -8  | -7.5344  | -25.7503 | -9.8618  |
| -7  | -5.55383 | -25.2993 | -7.25794 |
| -6  | -4.10796 | -26.9207 | -5.201   |
| -5  | -2.86937 | -24.9371 | -3.57512 |
| -4  | -1.94441 | -23.1699 | -2.30401 |
| -3  | -1.15183 | -25.9453 | -1.33786 |
| -2  | -0.50559 | -24.9663 | -0.64415 |
| -1  | -0.20269 | -23.2871 | -0.20218 |
| 0   | 0        | -22.228  | 0        |
| 1   | -0.16755 | -22.1473 | -0.0328  |
| 2   | -0.35281 | -22.7253 | -0.30244 |
| 3   | -0.87727 | -21.1519 | -0.81784 |
| 4   | -1.73024 | -21.4502 | -1.59657 |
| 5   | -2.82565 | -22.3969 | -2.66802 |
| 6   | -4.41103 | -22.4358 | -4.07976 |
| 7   | -6.29264 | -22.3047 | -5.91018 |
| 8   | -8.91629 | -24.5581 | -8.29599 |
| 9   | -12.1564 | -26.2636 | -11.4998 |
| 10  | -15.6058 | -28.6178 | -16.0943 |
| 11  | -20.3882 | -30.7147 | -23.0337 |
| 12  | -17.2799 | -34.43   | -23.1926 |
| 13  | -15.9794 | -31.571  | -17.9976 |
| 14  | -14.6356 | -36.6198 | -15.143  |
| 15  | -13.7822 | -40.2315 | -13.6402 |
| 16  | -12.4894 | -28.4606 | -12.9733 |
| 17  | -14.1326 | -35.0152 | -12.914  |
| 18  | -14.5091 | -31.8958 | -13.3526 |
| 19  | -14.9028 | -27.8885 | -14.235  |
| 20  | -15.6549 | -26.789  | -15.5298 |
| 21  | -16.0985 | -30.1147 | -17.1956 |
| 22  | -16.4654 | -30.896  | -19.1171 |
| 23  | -16.9782 | -30.6878 | -20.9925 |
| 24  | -17.5489 | -28.6797 | -22.3176 |
| 25  | -18.7186 | -29.8156 | -22.8355 |
| 26  | -19.8945 | -30.9106 | -22.928  |
| 27  | -21.6498 | -29.7832 | -23.1508 |
| 28  | -23.2076 | -29.922  | -23.846  |
| 29  | -25.0874 | -30.6236 | -25.1442 |
| 30  | -27.6456 | -30.1229 | -26.7736 |
| 31  | -29.4373 | -30.3323 | -27.2361 |
| 32  | -20.4652 | -29.825  | -25.1852 |

33 -18.1244 -31.2814 -22.2767  
34 -17.2235 -30.3835 -19.7379  
35 -14.3026 -32.8777 -17.7397  
36 -13.6036 -32.5242 -16.2149  
37 -12.716 -33.0646 -15.0838  
38 -12.5123 -30.5267 -14.2867  
39 -12.4913 -32.1508 -13.7823  
40 -12.5217 -30.1741 -13.5442  
41 -12.9042 -27.6906 -13.5575  
42 -13.2533 -28.8928 -13.8177  
43 -14.3278 -29.587 -14.3303  
44 -14.8178 -30.0126 -15.1137  
45 -15.4528 -31.7031 -16.2028  
46 -17.5413 -28.7861 -17.66  
47 -20.6456 -33.8138 -19.5948  
48 -21.6565 -31.3773 -22.2079  
49 -23.4567 -28.4335 -25.8711  
50 -24.9821 -27.6084 -30.7915  
51 -26.4511 -27.6987 -31.5393  
52 -28.1465 -30.0795 -27.0149  
53 -30.4564 -29.806 -23.5819  
54 -28.1215 -30.5594 -21.2386  
55 -23.5412 -27.6419 -19.5795  
56 -20.8951 -28.5128 -18.3779  
57 -18.5489 -28.028 -17.5053  
58 -16.8712 -28.765 -16.8833  
59 -15.4897 -29.7712 -16.4605  
60 -16.4343 -27.4765 -16.2009  
61 -18.13 -27.5121 -16.0784  
62 -17.9854 -27.4952 -16.0728  
63 -18.1151 -26.3184 -16.168  
64 -17.3028 -27.5957 -16.3506  
65 -17.8792 -27.8914 -16.609  
66 -18.468 -27.0457 -16.9325  
67 -18.9847 -27.6808 -17.3111  
68 -19.7239 -28.3173 -17.7352  
69 -19.9284 -28.6298 -18.1949  
70 -21.3317 -27.3595 -18.6802  
71 -22.4107 -29.3687 -19.1807  
72 -23.3369 -28.9065 -19.6856  
73 -23.2287 -27.2249 -20.184  
74 -24.9594 -28.1941 -20.6654  
75 -26.2668 -32.8946 -21.1198  
76 -28.479 -33.2956 -21.5384  
77 -27.697 -32.714 -21.9145  
78 -30.3943 -32.269 -22.2437  
79 -28.0027 -33.4105 -22.524  
80 -33.6286 -32.8988 -22.756  
81 -33.6599 -31.2468 -22.9422  
82 -39.5054 -31.3013 -23.0866  
83 -33.4424 -30.8845 -23.1941  
84 -26.9658 -30.7885 -23.2698  
85 -31.4371 -30.4716 -23.3187  
86 -32.5355 -30.1988 -23.3453

87 -27.7886 -29.583 -23.3536  
88 -23.4964 -30.0255 -23.3467  
89 -24.7225 -29.4214 -23.3274  
90 -22.2544 -29.1644 -23.2977  
91 -21.8847 -30.8385 -23.2594  
92 -21.6545 -31.2815 -23.2139  
93 -21.3984 -30.8688 -23.1621  
94 -21.1255 -30.7463 -23.1049  
95 -20.9847 -32.8405 -23.0432  
96 -20.7981 -32.8474 -22.9776  
97 -20.5841 -32.8128 -22.9087  
98 -20.3452 -32.8863 -22.8371  
99 -20.1125 -32.8697 -22.7637  
100 -20.0123 -32.759 -22.6889  
101 -20.1578 -33.175 -22.6136  
102 -20.2156 -36.255 -22.5388  
103 -20.3456 -36.139 -22.4653  
104 -20.4564 -36.6503 -22.3945  
105 -20.568 -36.1194 -22.3277  
106 -22.7714 -36.9213 -22.2666  
107 -28.6576 -37.1159 -22.2133  
108 -33.1529 -37.1793 -22.1703  
109 -29.0301 -37.4498 -22.1405  
110 -35.8774 -37.2925 -22.1272  
111 -33.5465 -38.6309 -22.1345  
112 -30.3597 -40.2207 -22.1672  
113 -29.353 -38.5953 -22.2308  
114 -33.1976 -40.9992 -22.3316  
115 -30.8376 -40.0989 -22.4773  
116 -31.8675 -40.5076 -22.6766  
117 -31.3497 -40.5161 -22.9401  
118 -31.8995 -42.7619 -23.2803  
119 -33.7192 -43.3753 -23.7129  
120 -32.5556 -45.4374 -24.2575  
121 -32.3733 -47.0033 -24.9394  
122 -31.2584 -49.2949 -25.793  
123 -29.4022 -51.2818 -26.8663  
124 -30.8873 -53.455 -28.2311  
125 -30.1372 -52.4267 -30.0006  
126 -30.6876 -52.5022 -32.3642  
127 -35.566 -51.5998 -35.6312  
128 -36.7532 -49.4721 -39.8071  
129 -36.8865 -46.2045 -40.4445  
130 -37.9468 -47.6986 -36.2705  
131 -40.0498 -48.2879 -32.7303  
132 -43.3125 -44.9759 -30.1841  
133 -39.2351 -44.98 -28.3166  
134 -33.3859 -38.5095 -26.929  
135 -31.2455 -40.526 -25.9086  
136 -30.9707 -38.4304 -25.1902  
137 -29.2537 -37.1497 -24.7354  
138 -28.6939 -40.7157 -24.5224  
139 -29.1785 -40.1972 -24.5403  
140 -29.8043 -40.9702 -24.787

141 -29.2636 -44.6963 -25.2666  
142 -30.0803 -48.5781 -25.9897  
143 -28.1442 -45.5409 -26.9733  
144 -30.4748 -51.7772 -28.2407  
145 -30.1309 -47.3787 -29.8225  
146 -30.8397 -49.3019 -31.7569  
147 -32.531 -47.7478 -34.0888  
148 -29.9188 -55.8693 -36.867  
149 -32.6833 -51.2638 -40.1436  
150 -32.7085 -53.7968 -43.9911  
151 -31.7516 -53.051 -48.419  
152 -33.9655 -56.8353 -51.0132  
153 -33.9888 -51.8731 -47.2617  
154 -33.8694 -42.3536 -42.7048  
155 -36.2475 -28.6143 -39.149  
156 -30.3983 -37.0785 -36.4349  
157 -29.9474 -26.3975 -34.3831  
158 -28.3412 -36.475 -32.8814  
159 -26.9204 -36.2645 -31.8615  
160 -26.1127 -41.8677 -31.2841  
161 -25.7745 -45.9902 -31.1312  
162 -24.95 -44.2117 -31.4022  
163 -24.5539 -45.6988 -32.1108  
164 -25.772 -44.5216 -33.2789  
165 -26.2821 -40.2466 -34.9114  
166 -25.3181 -40.0718 -36.9065  
167 -25.4789 -40.2613 -38.8154  
168 -26.1691 -39.2051 -39.7569  
169 -26.5142 -40.4768 -39.512  
170 -26.7961 -39.6091 -38.9846  
171 -27.0443 -40.9601 -38.936  
172 -26.4847 -41.1773 -39.7452  
173 -25.6919 -42.6677 -41.7662  
174 -25.8483 -42.7203 -45.506  
175 -26.5143 -46.7138 -48.2139  
176 -27.0831 -42.894 -43.2538  
177 -27.1936 -42.4835 -38.8064  
178 -28.3719 -25.5995 -35.871  
179 -29.5482 -24.697 -33.917  
180 -27.3282 -21.1958 -32.6431

Figure7(b)

|      |          |          |          |
|------|----------|----------|----------|
| -180 | -39.9748 | -44.3663 | -38.8942 |
| -179 | -36.1225 | -40.2851 | -38.3361 |
| -178 | -31.9831 | -40.088  | -38.6181 |
| -177 | -29.3817 | -43.1058 | -39.8677 |
| -176 | -27.9612 | -44.9839 | -42.3918 |
| -175 | -26.7731 | -46.8595 | -46.2349 |
| -174 | -27.863  | -42.6896 | -46.0755 |
| -173 | -28.0711 | -41.0666 | -41.2689 |
| -172 | -30.785  | -41.6103 | -37.6333 |
| -171 | -32.9512 | -40.0861 | -35.2306 |
| -170 | -33.5581 | -40.8535 | -33.697  |
| -169 | -37.9095 | -40.9173 | -32.83   |
| -168 | -36.8058 | -39.089  | -32.5253 |
| -167 | -34.2215 | -39.3514 | -32.7339 |
| -166 | -32.0089 | -40.151  | -33.4406 |
| -165 | -33.7011 | -39.7305 | -34.652  |
| -164 | -40.7724 | -40.2884 | -36.3788 |
| -163 | -38.5957 | -40.6095 | -38.5908 |
| -162 | -31.8519 | -43.1306 | -41.0968 |
| -161 | -29.9122 | -40.8052 | -43.4003 |
| -160 | -30.7936 | -44.4603 | -45.1016 |
| -159 | -29.158  | -41.9719 | -46.8639 |
| -158 | -28.2484 | -43.3591 | -50.4944 |
| -157 | -29.788  | -44.3756 | -58.1658 |
| -156 | -30.1952 | -44.1284 | -48.2305 |
| -155 | -29.1864 | -41.6283 | -41.4579 |
| -154 | -30.3675 | -40.0422 | -37.2202 |
| -153 | -29.6249 | -40.0928 | -34.2427 |
| -152 | -31.068  | -40.7116 | -32.0651 |
| -151 | -31.8379 | -38.4852 | -30.4709 |
| -150 | -33.5221 | -39.1488 | -29.342  |
| -149 | -34.8642 | -41.7274 | -28.6087 |
| -148 | -34.7018 | -40.1623 | -28.2287 |
| -147 | -32.4212 | -40.7509 | -28.178  |
| -146 | -32.597  | -40.0297 | -28.4454 |
| -145 | -35.4184 | -40.1486 | -29.0303 |
| -144 | -33.257  | -39.4789 | -29.9407 |
| -143 | -35.7621 | -41.54   | -31.1893 |
| -142 | -40.3274 | -40.7524 | -32.7817 |
| -141 | -40.2932 | -40.4369 | -34.6778 |
| -140 | -34.6847 | -41.1733 | -36.6845 |
| -139 | -33.2434 | -40.8443 | -38.2892 |
| -138 | -30.8261 | -40.2493 | -38.8683 |
| -137 | -28.8981 | -43.0023 | -38.5183 |
| -136 | -26.1489 | -39.9411 | -37.9101 |
| -135 | -29.3762 | -43.3418 | -37.4912 |
| -134 | -29.3398 | -39.3514 | -37.3935 |
| -133 | -28.4329 | -42.0529 | -37.5686 |
| -132 | -28.6495 | -42.3796 | -37.8119 |
| -131 | -28.8089 | -41.9699 | -37.746  |
| -130 | -28.1047 | -42.8989 | -37.0029 |



-129 -30.9098 -42.8091 -35.5994  
-128 -30.1964 -42.6495 -33.8876  
-127 -29.9766 -39.8915 -32.1783  
-126 -31.3877 -39.8549 -30.6176  
-125 -30.8837 -39.5029 -29.2478  
-124 -30.3738 -37.7054 -28.0665  
-123 -30.4258 -38.7307 -27.0568  
-122 -30.9318 -38.6819 -26.1983  
-121 -30.5625 -37.3843 -25.4716  
-120 -30.3726 -37.5474 -24.8593  
-119 -30.5088 -37.6534 -24.3463  
-118 -31.8866 -37.0675 -23.9194  
-117 -31.6516 -37.0746 -23.5675  
-116 -31.9829 -39.8859 -23.2809  
-115 -29.0479 -40.6607 -23.0514  
-114 -29.6013 -39.9065 -22.8719  
-113 -29.6562 -38.9906 -22.7364  
-112 -30.2808 -40.0996 -22.6395  
-111 -31.8451 -40.2235 -22.5767  
-110 -31.0192 -39.1791 -22.544  
-109 -31.723 -38.9241 -22.5379  
-108 -32.6916 -40.3909 -22.5553  
-107 -31.0117 -40.0336 -22.5932  
-106 -30.5448 -40.5922 -22.6488  
-105 -32.834 -39.8621 -22.7195  
-104 -33.4827 -41.2137 -22.8026  
-103 -30.9335 -40.533 -22.8953  
-102 -33.0551 -40.7871 -22.995  
-101 -33.6865 -41.1356 -23.0986  
-100 -33.4629 -41.4705 -23.2031  
-99 -34.5641 -43.223 -23.3053  
-98 -35.3662 -39.6102 -23.4015  
-97 -35.8795 -39.0075 -23.4883  
-96 -36.7304 -40.1115 -23.562  
-95 -36.8213 -41.2898 -23.6186  
-94 -33.908 -40.5872 -23.6543  
-93 -32.8129 -41.7342 -23.6655  
-92 -33.7197 -40.4909 -23.6486  
-91 -33.1922 -42.6896 -23.6006  
-90 -32.256 -41.804 -23.5189  
-89 -25.9559 -42.5166 -23.4016  
-88 -26.0801 -40.2673 -23.2477  
-87 -23.9486 -39.663 -23.0572  
-86 -23.9723 -38.5964 -22.8311  
-85 -23.0973 -40.734 -22.5712  
-84 -22.1701 -39.9734 -22.2807  
-83 -23.1779 -39.2204 -21.9633  
-82 -23.2404 -38.1069 -21.6235  
-81 -19.4235 -38.9883 -21.2666  
-80 -19.6785 -38.2955 -20.8982  
-79 -19.5851 -37.439 -20.5243  
-78 -19.5803 -37.1841 -20.1511  
-77 -19.9539 -37.2527 -19.785  
-76 -19.9132 -38.2227 -19.4327

-75 -18.5654 -36.6214 -19.1007  
-74 -19.2504 -37.7 -18.7961  
-73 -19.5623 -36.6888 -18.526  
-72 -19.074 -37.9181 -18.2981  
-71 -19.0158 -37.2096 -18.1206  
-70 -18.9796 -38.0074 -18.0026  
-69 -18.9381 -36.4987 -17.9544  
-68 -18.5217 -37.7495 -17.988  
-67 -18.8596 -37.2936 -18.1178  
-66 -18.3555 -36.941 -18.3616  
-65 -19.0495 -37.1637 -18.7427  
-64 -19.9514 -36.6399 -19.2918  
-63 -19.5544 -37.8955 -20.0527  
-62 -18.8201 -39.5299 -21.0908  
-61 -19.0054 -40.3966 -22.5124  
-60 -18.9737 -40.2747 -24.5082  
-59 -19.3883 -40.3247 -27.4789  
-58 -23.2483 -41.6118 -32.4835  
-57 -22.3387 -41.3185 -40.5741  
-56 -22.9797 -41.7062 -32.7055  
-55 -23.5957 -38.4084 -26.9305  
-54 -23.9757 -41.9688 -23.3864  
-53 -24.0542 -38.9397 -20.9058  
-52 -25.2109 -39.4976 -19.065  
-51 -24.8819 -40.8781 -17.673  
-50 -26.0331 -42.6137 -16.6317  
-49 -26.2881 -38.9401 -15.8889  
-48 -27.0714 -40.033 -15.4187  
-47 -26.2879 -30.2278 -15.2131  
-46 -27.3884 -37.2574 -15.2801  
-45 -26.9044 -34.2869 -15.644  
-44 -26.629 -34.6807 -16.3515  
-43 -24.1743 -41.2437 -17.4851  
-42 -23.7211 -34.5702 -19.1935  
-41 -24.4998 -35.2725 -21.7678  
-40 -25.9701 -31.4104 -25.8291  
-39 -27.4325 -31.2464 -31.6353  
-38 -27.8841 -30.1748 -28.7445  
-37 -24.0692 -36.877 -23.4109  
-36 -21.3525 -28.5801 -20.0767  
-35 -18.4283 -32.1082 -17.9351  
-34 -16.0921 -29.4499 -16.5889  
-33 -15.4366 -33.2183 -15.8772  
-32 -15.0481 -30.4895 -15.7632  
-31 -15.4669 -30.2189 -16.3135  
-30 -15.1178 -26.5357 -17.7529  
-29 -15.3291 -27.7798 -20.7168  
-28 -15.1595 -26.997 -27.8805  
-27 -17.6551 -29.0887 -31.799  
-26 -17.6256 -33.6695 -19.6434  
-25 -15.5601 -28.9089 -14.243  
-24 -12.0668 -28.0235 -10.6702  
-23 -10.6827 -25.2211 -8.01507  
-22 -7.29569 -23.0842 -5.94107

|     |          |          |          |
|-----|----------|----------|----------|
| -21 | -5.26369 | -25.1193 | -4.28679 |
| -20 | -3.67151 | -22.9175 | -2.96305 |
| -19 | -2.66164 | -24.4435 | -1.91649 |
| -18 | -1.46489 | -27.6907 | -1.11377 |
| -17 | -0.72325 | -24.8618 | -0.53403 |
| -16 | -0.2951  | -28.0565 | -0.16482 |
| -15 | 0        | -27.2527 | 0        |
| -14 | -0.02376 | -26.0784 | -0.03862 |
| -13 | 0.06965  | -28.1455 | -0.28448 |
| -12 | -0.29301 | -30.2177 | -0.7463  |
| -11 | -0.89653 | -30.3657 | -1.43837 |
| -10 | -1.95734 | -28.7216 | -2.38187 |
| -9  | -2.89849 | -27.9334 | -3.60698 |
| -8  | -3.86417 | -26.8872 | -5.15588 |
| -7  | -5.50642 | -27.6928 | -7.08575 |
| -6  | -7.078   | -30.6166 | -9.46531 |
| -5  | -8.36656 | -28.0644 | -12.3298 |
| -4  | -9.97949 | -24.8682 | -15.4326 |
| -3  | -10.7215 | -28.4134 | -17.5605 |
| -2  | -11.4619 | -26.7655 | -17.4455 |
| -1  | -11.4743 | -26.6809 | -16.3401 |
| 0   | -11.6052 | -23.5132 | -15.5232 |
| 1   | -12.7833 | -25.4519 | -15.2915 |
| 2   | -12.5963 | -25.8887 | -15.6421 |
| 3   | -14.5427 | -28.3905 | -16.5081 |
| 4   | -14.4481 | -22.8735 | -17.7337 |
| 5   | -16.2825 | -27.3265 | -18.9157 |
| 6   | -18.8679 | -25.6904 | -19.3549 |
| 7   | -19.7662 | -24.1434 | -18.7448 |
| 8   | -18.5713 | -24.5724 | -17.6359 |
| 9   | -17.7782 | -22.7743 | -16.6335 |
| 10  | -15.3606 | -22.5325 | -16.0077 |
| 11  | -15.0793 | -23.2862 | -15.849  |
| 12  | -15.9416 | -23.8887 | -16.2075 |
| 13  | -16.1218 | -22.8141 | -17.1589 |
| 14  | -16.3933 | -22.9718 | -18.8582 |
| 15  | -16.6778 | -23.0451 | -21.6293 |
| 16  | -17.5649 | -22.2624 | -26.0272 |
| 17  | -17.9071 | -23.551  | -29.2343 |
| 18  | -18.1317 | -23.3679 | -24.4172 |
| 19  | -18.8937 | -25.9754 | -20.1625 |
| 20  | -19.5105 | -27.1731 | -17.358  |
| 21  | -20.1213 | -27.4989 | -15.4584 |
| 22  | -19.2513 | -26.3027 | -14.1691 |
| 23  | -18.7046 | -28.5714 | -13.3321 |
| 24  | -18.0983 | -27.7332 | -12.8532 |
| 25  | -17.4864 | -27.9117 | -12.6687 |
| 26  | -16.6652 | -25.3705 | -12.7268 |
| 27  | -18.2989 | -25.8297 | -12.9743 |
| 28  | -24.2406 | -29.8956 | -13.345  |
| 29  | -27.8737 | -27.904  | -13.7507 |
| 30  | -23.5131 | -31.2098 | -14.0834 |
| 31  | -19.2878 | -29.7443 | -14.2412 |
| 32  | -16.8933 | -28.6435 | -14.1729 |

33 -14.7143 -33.8714 -13.9041  
34 -14.2311 -37.4889 -13.5158  
35 -12.4233 -34.1986 -13.0983  
36 -12.6952 -33.279 -12.7201  
37 -12.6887 -39.3033 -12.4211  
38 -12.4349 -32.491 -12.2173  
39 -12.3437 -34.8897 -12.1081  
40 -12.1117 -41.5435 -12.0821  
41 -12.9481 -34.3073 -12.1205  
42 -13.1814 -29.4992 -12.201  
43 -12.9874 -28.1702 -12.3012  
44 -13.8435 -28.4592 -12.402  
45 -13.8434 -27.4583 -12.4913  
46 -13.9363 -27.3806 -12.5662  
47 -14.0526 -28.7167 -12.6332  
48 -14.3992 -26.7098 -12.7053  
49 -15.048 -28.7277 -12.7997  
50 -16.8244 -26.8438 -12.9341  
51 -19.3213 -27.3288 -13.1247  
52 -20.1309 -26.5069 -13.3856  
53 -22.6079 -29.4262 -13.7278  
54 -28.5659 -30.3161 -14.16  
55 -26.1521 -29.4644 -14.689  
56 -24.4893 -31.29 -15.3197  
57 -22.9237 -29.3597 -16.0554  
58 -19.9432 -28.3946 -16.8976  
59 -20.4792 -31.3884 -17.8449  
60 -17.3102 -31.7887 -18.8907  
61 -16.1664 -31.4492 -20.0196  
62 -15.5093 -33.2527 -21.2009  
63 -15.9393 -32.058 -22.3801  
64 -15.2545 -31.0457 -23.4726  
65 -15.9016 -31.8002 -24.3714  
66 -16.0207 -32.3054 -24.9825  
67 -14.9005 -31.6108 -25.2748  
68 -16.8739 -31.6984 -25.3001  
69 -18.5892 -32.7028 -25.1582  
70 -17.6666 -32.056 -24.947  
71 -17.3046 -33.3621 -24.7371  
72 -17.5611 -32.7178 -24.5701  
73 -18.6978 -31.8539 -24.467  
74 -19.2298 -33.1082 -24.4356  
75 -19.9618 -33.8373 -24.4764  
76 -19.0777 -33.269 -24.5863  
77 -19.0961 -33.0861 -24.7596  
78 -19.5914 -31.3545 -24.99  
79 -20.2035 -32.8757 -25.2701  
80 -20.2243 -31.1259 -25.5922  
81 -25.0135 -34.5815 -25.9481  
82 -23.639 -32.2163 -26.329  
83 -23.7235 -32.9461 -26.7253  
84 -25.9254 -32.4935 -27.127  
85 -24.6898 -32.6606 -27.5229  
86 -26.1474 -34.2014 -27.9014

87 -26.251 -30.7459 -28.2504  
88 -31.9345 -32.2794 -28.558  
89 -28.3587 -32.1084 -28.8131  
90 -31.3073 -32.4429 -29.0062  
91 -35.2262 -34.0452 -29.1306  
92 -26.7402 -34.4113 -29.1831  
93 -25.8955 -34.0151 -29.1642  
94 -29.0397 -34.1711 -29.078  
95 -26.4326 -34.3274 -28.9316  
96 -26.273 -35.7473 -28.7343  
97 -26.9799 -35.025 -28.4964  
98 -25.5201 -33.7371 -28.2284  
99 -27.0183 -34.3855 -27.9405  
100 -27.4678 -32.5603 -27.6419  
101 -25.4853 -33.2724 -27.3408  
102 -26.414 -35.2525 -27.0442  
103 -25.5058 -35.9021 -26.758  
104 -25.8695 -36.0116 -26.4873  
105 -27.5996 -37.2791 -26.2361  
106 -26.7437 -36.3861 -26.0078  
107 -27.6074 -36.562 -25.805  
108 -27.2498 -35.2789 -25.6299  
109 -27.453 -37.2102 -25.4841  
110 -27.8222 -38.2344 -25.3685  
111 -27.2763 -38.891 -25.2837  
112 -28.1595 -37.6928 -25.2297  
113 -29.7714 -38.0698 -25.206  
114 -28.5814 -37.9679 -25.2113  
115 -26.7935 -40.0655 -25.244  
116 -26.5953 -38.9643 -25.302  
117 -25.7378 -38.0979 -25.3827  
118 -26.6596 -38.0369 -25.4835  
119 -26.5197 -38.3992 -25.6025  
120 -25.6319 -38.3191 -25.7387  
121 -27.8129 -38.7562 -25.8928  
122 -27.7283 -38.6849 -26.0685  
123 -27.5485 -40.1909 -26.2725  
124 -27.2508 -40.502 -26.5158  
125 -28.8706 -41.8804 -26.8139  
126 -28.5687 -42.5755 -27.1872  
127 -28.1484 -44.2997 -27.6621  
128 -27.948 -43.5353 -28.272  
129 -28.3727 -45.7107 -29.0601  
130 -28.7165 -43.607 -30.0846  
131 -28.7518 -41.9807 -31.4282  
132 -29.4653 -42.5379 -33.2148  
133 -29.3521 -43.6651 -35.6328  
134 -30.1203 -44.4534 -38.8724  
135 -31.8648 -42.6171 -41.9865  
136 -32.9192 -45.4077 -40.7194  
137 -32.0172 -43.2508 -37.1101  
138 -33.0921 -43.8556 -34.1824  
139 -31.5619 -42.1753 -32.0469  
140 -32.3775 -47.1669 -30.5014

141 -36.5017 -43.3789 -29.405  
142 -34.5402 -43.3704 -28.6712  
143 -33.0754 -44.2693 -28.2464  
144 -41.5272 -40.0373 -28.0951  
145 -33.0685 -44.801 -28.1919  
146 -33.5536 -39.0182 -28.5154  
147 -32.9733 -38.1407 -29.0425  
148 -31.8664 -39.1229 -29.7439  
149 -28.4066 -37.95 -30.5801  
150 -29.6678 -38.163 -31.5014  
151 -28.6074 -36.8964 -32.457  
152 -27.7528 -40.4824 -33.4143  
153 -28.1415 -40.6946 -34.3801  
154 -29.3227 -39.5225 -35.4035  
155 -29.0869 -42.3186 -36.547  
156 -28.9556 -41.0243 -37.8162  
157 -30.5829 -44.3936 -39.0275  
158 -31.9787 -45.478 -39.684  
159 -32.9918 -38.1241 -39.3252  
160 -35.7662 -45.753 -38.218  
161 -36.1316 -44.8747 -36.9962  
162 -40.8267 -43.3799 -36.046  
163 -39.3388 -42.1414 -35.5125  
164 -39.4989 -38.2452 -35.4473  
165 -38.6307 -39.8337 -35.8855  
166 -37.8164 -42.0057 -36.8792  
167 -39.9911 -38.8042 -38.5233  
168 -39.0805 -40.4478 -40.9948  
169 -39.8488 -39.9597 -44.6435  
170 -40.5136 -40.2633 -50.1753  
171 -40.3598 -40.5049 -56.6781  
172 -41.3821 -40.1275 -54.2527  
173 -35.8602 -39.7816 -52.1468  
174 -35.3124 -42.1015 -52.8429  
175 -33.4829 -41.4303 -54.8608  
176 -32.5649 -46.1368 -51.5255  
177 -35.3866 -46.3222 -46.3226  
178 -38.0238 -43.6823 -42.673  
179 -37.6052 -48.7528 -40.2963  
180 -41.7184 -54.0383 -38.8942

Figure7(c)

|      |          |          |          |
|------|----------|----------|----------|
| -180 | -35.7025 | -35.1458 | -33.6917 |
| -179 | -34.4039 | -34.7884 | -33.7826 |
| -178 | -33.6701 | -39.2532 | -34.162  |
| -177 | -33.1221 | -41.264  | -34.5864 |
| -176 | -31.6177 | -43.4564 | -34.6716 |
| -175 | -31.1405 | -44.645  | -34.1528 |
| -174 | -31.5098 | -41.4654 | -33.1884 |
| -173 | -31.1834 | -44.897  | -32.1611 |
| -172 | -32.3133 | -42.6498 | -31.3533 |
| -171 | -30.3539 | -43.9745 | -30.9013 |
| -170 | -31.4894 | -41.4654 | -30.8655 |
| -169 | -31.2866 | -44.654  | -31.2825 |
| -168 | -30.8045 | -40.4989 | -32.1928 |
| -167 | -31.1956 | -39.4985 | -33.656  |
| -166 | -30.0198 | -33.546  | -35.7606 |
| -165 | -30.9799 | -38.456  | -38.6187 |
| -164 | -30.7691 | -39.345  | -42.2597 |
| -163 | -30.8541 | -43.64   | -46.0687 |
| -162 | -32.7154 | -44.6454 | -48.3322 |
| -161 | -33.0707 | -48.5146 | -49.6083 |
| -160 | -33.5265 | -46.645  | -51.2757 |
| -159 | -32.9458 | -40.6432 | -47.6791 |
| -158 | -31.7511 | -38.9636 | -41.57   |
| -157 | -31.4118 | -34.2297 | -36.943  |
| -156 | -30.9197 | -37.5279 | -33.5277 |
| -155 | -30.4105 | -38.4523 | -30.9562 |
| -154 | -30.3228 | -42.7364 | -29.0106 |
| -153 | -29.7722 | -34.6234 | -27.5607 |
| -152 | -29.9308 | -39.1651 | -26.5239 |
| -151 | -29.785  | -37.204  | -25.8458 |
| -150 | -29.1476 | -36.3185 | -25.4888 |
| -149 | -28.8942 | -32.9383 | -25.4258 |
| -148 | -30.5152 | -35.903  | -25.6351 |
| -147 | -30.0635 | -34.4079 | -26.0955 |
| -146 | -30.1404 | -35.4031 | -26.7807 |
| -145 | -29.5947 | -31.7576 | -27.6517 |
| -144 | -29.2443 | -32.813  | -28.6493 |
| -143 | -30.0179 | -37.3273 | -29.6933 |
| -142 | -30.8944 | -34.4385 | -30.7007 |
| -141 | -30.2668 | -31.8215 | -31.6306 |
| -140 | -31.6603 | -34.2177 | -32.5296 |
| -139 | -30.4989 | -38.4167 | -33.5347 |
| -138 | -29.039  | -35.093  | -34.83   |
| -137 | -29.885  | -34.6822 | -36.5473 |
| -136 | -29.0589 | -33.1165 | -38.3443 |
| -135 | -27.891  | -32.8956 | -38.3653 |
| -134 | -28.6099 | -35.4522 | -35.6826 |
| -133 | -28.5586 | -38.0296 | -32.4419 |
| -132 | -28.3629 | -32.7559 | -29.6515 |
| -131 | -28.3806 | -33.7365 | -27.374  |
| -130 | -29.5749 | -32.2659 | -25.5187 |

-129 -29.2601 -30.5877 -24.0006  
-128 -29.3997 -33.8741 -22.7565  
-127 -30.6022 -33.9052 -21.7404  
-126 -30.3145 -37.0563 -20.918  
-125 -30.9244 -34.331 -20.2634  
-124 -29.8753 -35.835 -19.7564  
-123 -30.9841 -38.4911 -19.3808  
-122 -30.5757 -35.5826 -19.1236  
-121 -30.1869 -36.4233 -18.974  
-120 -28.9023 -36.7816 -18.923  
-119 -28.755 -36.8974 -18.9631  
-118 -29.3502 -37.7724 -19.0878  
-117 -28.5391 -36.834 -19.2916  
-116 -29.2037 -34.2545 -19.5697  
-115 -28.7629 -35.735 -19.9181  
-114 -28.0588 -33.4546 -20.333  
-113 -29.1473 -34.3688 -20.8111  
-112 -29.491 -33.3863 -21.3493  
-111 -29.2792 -31.6216 -21.9441  
-110 -29.7402 -32.6944 -22.5917  
-109 -30.5646 -34.1334 -23.2867  
-108 -30.2034 -34.2223 -24.022  
-107 -30.5039 -31.6853 -24.7865  
-106 -31.9597 -32.5391 -25.5639  
-105 -33.0456 -33.0709 -26.3305  
-104 -33.456 -31.6864 -27.053  
-103 -34.0468 -31.9704 -27.6893  
-102 -34.3649 -31.8621 -28.1925  
-101 -34.9842 -32.8702 -28.5216  
-100 -35.2156 -31.4859 -28.6542  
-99 -35.4698 -31.6014 -28.5956  
-98 -36.2546 -31.0866 -28.3759  
-97 -36.6936 -31.6913 -28.0388  
-96 -41.2189 -31.041 -27.6293  
-95 -31.2579 -31.2432 -27.185  
-94 -27.3296 -32.4477 -26.7342  
-93 -25.8646 -31.6942 -26.2963  
-92 -26.3255 -31.7638 -25.8842  
-91 -22.8198 -32.4548 -25.506  
-90 -21.8056 -31.3915 -25.167  
-89 -22.2675 -31.5982 -24.8708  
-88 -18.8412 -31.3583 -24.6199  
-87 -21.5012 -32.0405 -24.4165  
-86 -18.5033 -33.6199 -24.2624  
-85 -19.2522 -32.8789 -24.1596  
-84 -18.9632 -32.4789 -24.1099  
-83 -17.7765 -32.943 -24.1149  
-82 -17.9666 -32.2167 -24.1757  
-81 -16.3065 -33.9358 -24.2918  
-80 -17.5099 -34.1694 -24.4602  
-79 -15.8209 -33.9218 -24.6732  
-78 -16.5958 -33.097 -24.9149  
-77 -16.8907 -33.3631 -25.1574  
-76 -15.8088 -33.8566 -25.3561



-75 -16.4227 -33.3112 -25.4492  
-74 -16.0336 -33.7192 -25.3665  
-73 -16.7322 -33.3354 -25.0521  
-72 -16.8573 -33.1665 -24.4908  
-71 -16.4509 -33.233 -23.7176  
-70 -16.9046 -33.5233 -22.8005  
-69 -15.8448 -33.0618 -21.8133  
-68 -16.7396 -33.9125 -20.8173  
-67 -17.0419 -33.4143 -19.8562  
-66 -17.9346 -32.9509 -18.9587  
-65 -18.3899 -34.0312 -18.1428  
-64 -18.7223 -33.9272 -17.4204  
-63 -18.6824 -34.351 -16.7999  
-62 -17.1714 -35.1699 -16.2886  
-61 -17.987 -34.5658 -15.8934  
-60 -18.1235 -36.1924 -15.6226  
-59 -19.4491 -36.0064 -15.4863  
-58 -20.9928 -35.0551 -15.4976  
-57 -22.6551 -35.5187 -15.6737  
-56 -26.105 -35.6751 -16.0376  
-55 -27.4204 -36.6998 -16.6204  
-54 -29.7144 -34.6764 -17.464  
-53 -34.0216 -34.4238 -18.6231  
-52 -29.2508 -36.5901 -20.1567  
-51 -24.6116 -35.2821 -22.0626  
-50 -22.6821 -37.2363 -23.9687  
-49 -17.418 -38.2343 -24.5364  
-48 -16.9871 -40.8861 -22.9158  
-47 -16.8529 -38.2888 -20.4879  
-46 -15.7156 -38.1728 -18.2728  
-45 -13.6368 -39.223 -16.4709  
-44 -14.3931 -35.6151 -15.0574  
-43 -13.262 -34.329 -13.9805  
-42 -13.5157 -34.9648 -13.1987  
-41 -12.582 -34.3389 -12.6829  
-40 -13.9082 -36.3536 -12.4142  
-39 -12.7341 -34.5319 -12.3799  
-38 -13.8588 -36.3372 -12.5685  
-37 -13.8488 -35.1536 -12.9626  
-36 -13.9238 -35.632 -13.5263  
-35 -13.6591 -38.1133 -14.1838  
-34 -14.238 -37.1202 -14.7959  
-33 -15.3238 -37.603 -15.167  
-32 -13.9667 -41.7253 -15.1405  
-31 -13.3654 -38.9635 -14.7298  
-30 -12.7354 -31.3329 -14.1129  
-29 -12.4234 -24.8103 -13.4983  
-28 -12.3138 -25.0598 -13.0383  
-27 -12.4602 -25.7236 -12.8276  
-26 -12.825 -24.6639 -12.9309  
-25 -12.4541 -23.8522 -13.4094  
-24 -12.9439 -26.3573 -14.3452  
-23 -13.8427 -30.1932 -15.875  
-22 -14.4662 -29.1068 -18.2682

|     |          |          |          |
|-----|----------|----------|----------|
| -21 | -16.8408 | -33.4637 | -22.186  |
| -20 | -19.0226 | -37.9569 | -30.2546 |
| -19 | -22.9673 | -39.908  | -35.5367 |
| -18 | -29.2133 | -35.8231 | -24.5301 |
| -17 | -29.7723 | -36.0702 | -20.4366 |
| -16 | -23.1575 | -29.9631 | -18.3514 |
| -15 | -18.8295 | -31.1969 | -17.3853 |
| -14 | -17.8755 | -39.8956 | -17.1724 |
| -13 | -16.0103 | -33.4043 | -17.3077 |
| -12 | -14.2856 | -33.5427 | -16.9621 |
| -11 | -12.9855 | -29.5322 | -15.2833 |
| -10 | -12.1479 | -28.2239 | -12.6605 |
| -9  | -9.72112 | -27.8096 | -9.96889 |
| -8  | -7.48725 | -30.9909 | -7.59291 |
| -7  | -5.57852 | -27.6519 | -5.60069 |
| -6  | -4.05868 | -24.3721 | -3.96886 |
| -5  | -2.82685 | -25.316  | -2.65921 |
| -4  | -1.84514 | -26.411  | -1.63783 |
| -3  | -1.02489 | -24.1835 | -0.87824 |
| -2  | -0.50671 | -24.4349 | -0.3608  |
| -1  | -0.11487 | -26.1927 | -0.07135 |
| 0   | 0        | -26.5392 | 0        |
| 1   | -0.19481 | -29.1896 | -0.13995 |
| 2   | -0.40488 | -27.4962 | -0.48637 |
| 3   | -1.31847 | -25.7718 | -1.03487 |
| 4   | -2.1541  | -34.5157 | -1.77937 |
| 5   | -3.82684 | -26.0532 | -2.70848 |
| 6   | -5.20182 | -29.2309 | -3.79986 |
| 7   | -7.06631 | -28.7744 | -5.01234 |
| 8   | -9.48352 | -30.7643 | -6.2785  |
| 9   | -12.014  | -28.7612 | -7.50731 |
| 10  | -13.7525 | -40.1193 | -8.61163 |
| 11  | -14.4896 | -33.9869 | -9.55953 |
| 12  | -13.7881 | -36.7877 | -10.4103 |
| 13  | -12.8875 | -31.6784 | -11.2994 |
| 14  | -13.6376 | -30.4377 | -12.398  |
| 15  | -13.9732 | -56.9579 | -13.9014 |
| 16  | -15.01   | -31.6066 | -16.0765 |
| 17  | -17.9471 | -51.2627 | -19.4415 |
| 18  | -22.4719 | -41.2536 | -25.6208 |
| 19  | -28.8094 | -35.5902 | -49.1412 |
| 20  | -22.9972 | -32.851  | -24.8389 |
| 21  | -18.8233 | -36.4486 | -19.4068 |
| 22  | -15.6004 | -29.1641 | -16.4666 |
| 23  | -13.0674 | -45.8447 | -14.6667 |
| 24  | -12.6167 | -30.8637 | -13.5741 |
| 25  | -12.585  | -31.3576 | -12.9976 |
| 26  | -12.446  | -34.6497 | -12.838  |
| 27  | -12.4001 | -36.3891 | -13.0384 |
| 28  | -12.512  | -28.9535 | -13.5582 |
| 29  | -12.5785 | -36.3855 | -14.3521 |
| 30  | -13.582  | -35.1769 | -15.3382 |
| 31  | -13.9834 | -38.1618 | -16.3478 |
| 32  | -15.5077 | -47.2099 | -17.0933 |

33 -14.9952 -42.2474 -17.2818  
34 -14.5877 -40.7783 -16.8835  
35 -14.4858 -42.0278 -16.1611  
36 -14.4127 -35.1304 -15.4064  
37 -14.3757 -33.3368 -14.7942  
38 -14.3712 -29.8341 -14.4019  
39 -14.356 -28.0852 -14.2589  
40 -14.422 -28.8051 -14.3773  
41 -15.1746 -27.7418 -14.766  
42 -15.5237 -30.3328 -15.437  
43 -17.8907 -28.5163 -16.4057  
44 -20.6207 -29.7078 -17.6819  
45 -27.3419 -32.5551 -19.2331  
46 -29.0783 -29.8222 -20.8671  
47 -23.075 -31.8783 -22.0132  
48 -18.5066 -31.4374 -21.9151  
49 -17.3934 -33.3785 -20.6725  
50 -15.3431 -35.5668 -19.0641  
51 -13.458 -34.8895 -17.568  
52 -14.1399 -36.178 -16.3207  
53 -12.9737 -32.9044 -15.3294  
54 -12.693 -32.8596 -14.5684  
55 -12.5519 -33.0324 -14.0081  
56 -12.4471 -36.1635 -13.6232  
57 -12.6429 -31.2242 -13.3926  
58 -12.6109 -28.3863 -13.2996  
59 -13.6966 -29.7712 -13.3311  
60 -13.454 -34.5506 -13.4764  
61 -13.3159 -33.4136 -13.7269  
62 -13.1522 -30.1 -14.0757  
63 -13.4338 -35.143 -14.5172  
64 -13.9928 -33.1131 -15.0467  
65 -14.7758 -29.9925 -15.6604  
66 -15.7952 -29.9748 -16.3548  
67 -16.4639 -31.4707 -17.1263  
68 -17.368 -30.0696 -17.9709  
69 -17.0109 -31.6677 -18.8829  
70 -16.6056 -30.7241 -19.8539  
71 -18.5992 -30.0387 -20.8704  
72 -19.097 -32.9006 -21.9106  
73 -19.8182 -33.7386 -22.9408  
74 -18.7897 -30.0889 -23.912  
75 -20.1516 -30.0345 -24.7608  
76 -21.2804 -32.052 -25.4203  
77 -22.0836 -32.951 -25.8404  
78 -24.8879 -31.7433 -26.0099  
79 -25.5849 -31.2572 -25.9606  
80 -24.7212 -34.8708 -25.7513  
81 -22.3306 -35.6581 -25.4438  
82 -24.3605 -34.5719 -25.0889  
83 -26.8102 -31.6413 -24.7215  
84 -24.7282 -29.9395 -24.3632  
85 -29.5222 -31.927 -24.0258  
86 -24.873 -27.6207 -23.7152

87 -24.6475 -32.1669 -23.4333  
88 -27.7669 -30.4648 -23.1804  
89 -30.3252 -33.9931 -22.9554  
90 -32.5855 -32.6385 -22.7571  
91 -39.8383 -39.6892 -22.5841  
92 -32.619 -36.1938 -22.4353  
93 -33.6759 -36.5449 -22.3098  
94 -48.3062 -37.7879 -22.2071  
95 -35.7621 -38.0144 -22.1269  
96 -35.4468 -37.0803 -22.0694  
97 -30.6215 -36.3485 -22.0351  
98 -31.8921 -35.3452 -22.0247  
99 -28.1263 -35.1641 -22.0395  
100 -25.456 -35.8716 -22.0806  
101 -26.9595 -35.0237 -22.1497  
102 -28.3665 -36.906 -22.2484  
103 -30.0154 -37.5816 -22.3787  
104 -33.5414 -36.6726 -22.5423  
105 -29.2465 -36.7327 -22.7412  
106 -27.2345 -36.4113 -22.977  
107 -26.9645 -35.9644 -23.251  
108 -25.8745 -36.1742 -23.5637  
109 -25.374 -36.1097 -23.9149  
110 -25.2368 -36.3011 -24.3029  
111 -24.5803 -36.4505 -24.7241  
112 -24.522 -37.1083 -25.1724  
113 -24.042 -37.6181 -25.6392  
114 -23.738 -36.0404 -26.1128  
115 -23.5963 -37.037 -26.5797  
116 -24.0088 -35.9716 -27.0262  
117 -24.6427 -37.6845 -27.4417  
118 -25.4011 -37.2747 -27.8225  
119 -25.005 -37.9587 -28.1754  
120 -24.5696 -38.1505 -28.5186  
121 -24.2651 -38.5006 -28.8815  
122 -24.6044 -40.9333 -29.3014  
123 -23.1849 -40.4801 -29.8201  
124 -23.5093 -41.6853 -30.4791  
125 -23.5044 -42.0346 -31.3104  
126 -23.1252 -43.088 -32.3109  
127 -23.9999 -43.2063 -33.3728  
128 -23.2755 -42.2675 -34.1513  
129 -23.4117 -45.5134 -34.0751  
130 -22.7949 -48.2359 -32.9298  
131 -23.0434 -46.0249 -31.1873  
132 -23.1513 -46.8431 -29.3735  
133 -23.2328 -50.8748 -27.7349  
134 -24.5483 -43.4505 -26.3426  
135 -24.6507 -41.4998 -25.2035  
136 -26.4618 -44.2364 -24.3069  
137 -27.5458 -43.2756 -23.6404  
138 -28.9752 -38.2945 -23.1943  
139 -30.1625 -41.3087 -22.9629  
140 -29.5698 -38.7162 -22.9445

141 -30.9372 -41.2895 -23.1411  
142 -29.2336 -41.0686 -23.5581  
143 -30.3688 -42.1656 -24.204  
144 -29.7092 -40.9381 -25.0896  
145 -27.9051 -37.6114 -26.2255  
146 -28.3059 -38.5419 -27.6168  
147 -29.5625 -39.3509 -29.2494  
148 -29.8406 -38.0144 -31.0577  
149 -30.1051 -42.6902 -32.865  
150 -29.6532 -41.7192 -34.334  
151 -29.537 -41.7832 -35.0989  
152 -31.3068 -43.9523 -35.0949  
153 -31.2911 -44.4398 -34.573  
154 -28.8992 -42.4856 -33.7839  
155 -29.089 -43.4252 -32.8623  
156 -32.2091 -49.3313 -31.8923  
157 -30.7852 -39.9196 -30.9585  
158 -38.2524 -45.5727 -30.147  
159 -36.9411 -45.3762 -29.5324  
160 -37.3313 -42.7164 -29.1724  
161 -37.2815 -46.6954 -29.1121  
162 -33.3706 -43.1599 -29.3928  
163 -32.7424 -40.3374 -30.0608  
164 -31.5578 -41.7331 -31.1796  
165 -34.4911 -38.6343 -32.8475  
166 -34.5294 -39.6746 -35.2347  
167 -37.9043 -40.0492 -38.6717  
168 -40.167 -39.8889 -43.8693  
169 -34.1283 -40.0184 -50.6347  
170 -34.9877 -41.5521 -47.5027  
171 -31.4498 -44.3298 -43.5836  
172 -31.3389 -42.6335 -41.6252  
173 -31.482 -43.4503 -40.5888  
174 -31.6353 -43.4644 -39.743  
175 -31.4081 -46.7955 -38.6247  
176 -32.118 -50.1493 -37.2264  
177 -31.381 -48.4311 -35.8405  
178 -34.4172 -39.7077 -34.7226  
179 -31.7455 -42.181 -33.9957  
180 -32.7459 -49.5836 -33.6917

Figure7(d)

|      |          |          |          |
|------|----------|----------|----------|
| -180 | -43.2163 | -44.3663 | -41.8631 |
| -179 | -45.6677 | -40.2851 | -39.8355 |
| -178 | -46.0458 | -40.088  | -38.7319 |
| -177 | -47.5674 | -43.1058 | -38.5254 |
| -176 | -49.3951 | -44.9839 | -39.0921 |
| -175 | -43.9559 | -46.8595 | -40.0657 |
| -174 | -44.8071 | -42.6896 | -40.3721 |
| -173 | -42.3101 | -41.0666 | -38.9989 |
| -172 | -43.4944 | -41.6103 | -36.8043 |
| -171 | -41.3672 | -40.0861 | -34.8572 |
| -170 | -43.3776 | -40.8535 | -33.4821 |
| -169 | -43.6752 | -40.9173 | -32.714  |
| -168 | -49.5617 | -39.089  | -32.5445 |
| -167 | -47.6836 | -39.3514 | -32.9902 |
| -166 | -42.5224 | -40.151  | -34.1208 |
| -165 | -38.0981 | -39.7305 | -36.1051 |
| -164 | -34.3671 | -40.2884 | -39.3425 |
| -163 | -34.3005 | -40.6095 | -45.0282 |
| -162 | -35.7546 | -43.1306 | -60.7066 |
| -161 | -38.0049 | -40.8052 | -48.912  |
| -160 | -34.0592 | -44.4603 | -43.8411 |
| -159 | -28.2925 | -41.9719 | -42.1948 |
| -158 | -24.9692 | -43.3591 | -42.2577 |
| -157 | -25.574  | -44.3756 | -42.7734 |
| -156 | -24.7143 | -44.1284 | -41.0742 |
| -155 | -25.201  | -41.6283 | -37.3261 |
| -154 | -24.5964 | -40.0422 | -33.7972 |
| -153 | -25.9944 | -40.0928 | -31.0127 |
| -152 | -26.479  | -40.7116 | -28.8969 |
| -151 | -26.2558 | -38.4852 | -27.3329 |
| -150 | -27.5636 | -39.1488 | -26.2364 |
| -149 | -25.6618 | -41.7274 | -25.5552 |
| -148 | -27.1134 | -40.1623 | -25.2624 |
| -147 | -26.418  | -40.7509 | -25.3535 |
| -146 | -26.5303 | -40.0297 | -25.8483 |
| -145 | -26.9783 | -40.1486 | -26.7999 |
| -144 | -26.4603 | -39.4789 | -28.3184 |
| -143 | -29.612  | -41.54   | -30.6357 |
| -142 | -27.0169 | -40.7524 | -34.3207 |
| -141 | -29.0337 | -40.4369 | -41.404  |
| -140 | -27.2834 | -41.1733 | -48.7916 |
| -139 | -31.1899 | -40.8443 | -37.2333 |
| -138 | -29.1243 | -40.2493 | -32.5398 |
| -137 | -26.4489 | -43.0023 | -29.7969 |
| -136 | -26.9139 | -39.9411 | -28.0095 |
| -135 | -26.0172 | -43.3418 | -26.8083 |
| -134 | -25.1857 | -39.3514 | -26.0068 |
| -133 | -23.4795 | -42.0529 | -25.4868 |
| -132 | -23.4508 | -42.3796 | -25.1557 |
| -131 | -23.6539 | -41.9699 | -24.928  |
| -130 | -23.9659 | -42.8989 | -24.7194 |

-129 -20.8287 -42.8091 -24.4534  
-128 -17.2479 -42.6495 -24.0762  
-127 -18.7306 -39.8915 -23.5713  
-126 -19.2637 -39.8549 -22.9595  
-125 -19.0529 -39.5029 -22.2848  
-124 -18.1433 -37.7054 -21.5947  
-123 -18.6764 -38.7307 -20.9286  
-122 -16.2119 -38.6819 -20.3134  
-121 -17.2101 -37.3843 -19.7654  
-120 -16.5496 -37.5474 -19.2923  
-119 -17.2347 -37.6534 -18.8966  
-118 -17.8295 -37.0675 -18.5774  
-117 -17.5635 -37.0746 -18.3318  
-116 -16.921 -39.8859 -18.1561  
-115 -16.477 -40.6607 -18.0458  
-114 -17.8433 -39.9065 -17.9964  
-113 -17.0801 -38.9906 -18.0033  
-112 -18.1911 -40.0996 -18.062  
-111 -16.7512 -40.2235 -18.1681  
-110 -17.8599 -39.1791 -18.3173  
-109 -18.2294 -38.9241 -18.5053  
-108 -17.3833 -40.3909 -18.728  
-107 -18.3978 -40.0336 -18.9808  
-106 -18.6651 -40.5922 -19.2595  
-105 -20.4792 -39.8621 -19.5592  
-104 -20.6442 -41.2137 -19.875  
-103 -19.9347 -40.533 -20.2014  
-102 -20.9183 -40.7871 -20.5325  
-101 -21.1136 -41.1356 -20.8618  
-100 -24.004 -41.4705 -21.1821  
-99 -23.9848 -43.223 -21.4857  
-98 -27.1774 -39.6102 -21.7644  
-97 -27.6993 -39.0075 -22.0098  
-96 -27.9837 -40.1115 -22.2137  
-95 -23.9746 -41.2898 -22.3682  
-94 -28.8917 -40.5872 -22.4666  
-93 -32.2957 -41.7342 -22.5038  
-92 -29.3194 -40.4909 -22.4765  
-91 -25.6581 -42.6896 -22.3837  
-90 -29.1239 -40.804 -22.2263  
-89 -25.2073 -40.5166 -22.0072  
-88 -23.5171 -39.2673 -21.7307  
-87 -24.3658 -39.663 -21.4023  
-86 -22.5058 -38.5964 -21.0282  
-85 -21.8716 -38.734 -20.6147  
-84 -22.3526 -39.9734 -20.1685  
-83 -21.67 -39.2204 -19.6959  
-82 -22.0565 -38.1069 -19.2034  
-81 -18.5779 -38.9883 -18.6971  
-80 -20.0899 -37.2955 -18.1828  
-79 -17.9637 -37.439 -17.6665  
-78 -17.7932 -38.1841 -17.1537  
-77 -16.8114 -38.2527 -16.65  
-76 -16.0662 -39.2227 -16.1608

-75 -16.4913 -37.6214 -15.6917  
-74 -16.3884 -39.7 -15.2478  
-73 -14.9415 -40.6888 -14.8348  
-72 -14.8723 -40.9181 -14.4582  
-71 -14.1099 -41.2096 -14.1236  
-70 -14.4185 -41.0074 -13.8369  
-69 -12.8692 -41.4987 -13.6045  
-68 -13.2545 -41.7495 -13.4328  
-67 -12.7086 -41.2936 -13.3289  
-66 -12.5993 -41.941 -13.3004  
-65 -12.4528 -42.1637 -13.3551  
-64 -12.4883 -43.6399 -13.5013  
-63 -13.6035 -40.8955 -13.7464  
-62 -14.0154 -39.5299 -14.0965  
-61 -13.6928 -40.3966 -14.5521  
-60 -13.1349 -39.1788 -15.1025  
-59 -12.8176 -39.0847 -15.7137  
-58 -13.3032 -39.5929 -16.3094  
-57 -12.6422 -41.898 -16.7552  
-56 -12.404 -39.7088 -16.8785  
-55 -12.634 -34.9074 -16.5597  
-54 -13.3055 -35.2497 -15.8315  
-53 -12.6066 -35.208 -14.8538  
-52 -13.6316 -36.1079 -13.8018  
-51 -13.8489 -41.1519 -12.799  
-50 -14.2045 -43.8894 -11.9153  
-49 -15.1009 -47.2176 -11.1863  
-48 -13.6675 -41.6469 -10.6311  
-47 -15.4026 -33.12 -10.2617  
-46 -14.3327 -37.6142 -10.0897  
-45 -15.6979 -32.3874 -10.1295  
-44 -15.1727 -36.1437 -10.4015  
-43 -13.7058 -35.125 -10.9351  
-42 -13.5029 -31.5103 -11.7729  
-41 -13.2759 -37.2091 -12.9768  
-40 -14.0052 -32.8086 -14.632  
-39 -12.7156 -32.6873 -16.8229  
-38 -13.5722 -34.5011 -19.4173  
-37 -13.0737 -33.3346 -21.126  
-36 -12.4617 -37.184 -19.9835  
-35 -12.712 -32.4116 -17.5113  
-34 -12.6978 -31.8852 -15.3574  
-33 -11.9865 -37.4209 -13.7887  
-32 -11.2654 -44.8348 -12.7447  
-31 -10.8156 -40.0362 -12.1391  
-30 -10.984 -33.8949 -11.8852  
-29 -10.0499 -33.3812 -11.8607  
-28 -9.56132 -35.0953 -11.8508  
-27 -9.13654 -30.8192 -11.5278  
-26 -9.12426 -28.8098 -10.6162  
-25 -8.50114 -27.7275 -9.15925  
-24 -7.69211 -26.0998 -7.45418  
-23 -6.54171 -25.003 -5.77191  
-22 -5.64921 -24.2882 -4.25615



|     |          |          |          |
|-----|----------|----------|----------|
| -21 | -4.52888 | -25.9488 | -2.96229 |
| -20 | -3.42818 | -24.6096 | -1.90481 |
| -19 | -2.4085  | -26.8406 | -1.08313 |
| -18 | -1.48791 | -27.3322 | -0.49315 |
| -17 | -0.75048 | -27.775  | -0.13198 |
| -16 | -0.32803 | -28.7863 | 0        |
| -15 | 0        | -30.0689 | -0.1019  |
| -14 | -0.08019 | -30.2381 | -0.44769 |
| -13 | -0.20796 | -24.4332 | -1.05384 |
| -12 | -0.5139  | -26.2861 | -1.94496 |
| -11 | -1.31309 | -28.3622 | -3.15594 |
| -10 | -2.53295 | -30.0922 | -4.73382 |
| -9  | -3.61991 | -26.9845 | -6.7341  |
| -8  | -5.91595 | -28.3654 | -9.18763 |
| -7  | -7.61413 | -30.3937 | -11.9386 |
| -6  | -9.92938 | -29.6679 | -14.1696 |
| -5  | -13.164  | -26.8983 | -14.6179 |
| -4  | -12.9807 | -27.6122 | -13.7974 |
| -3  | -12.4746 | -28.8425 | -13.0424 |
| -2  | -11.9732 | -29.3473 | -12.8983 |
| -1  | -11.837  | -30.6424 | -13.5399 |
| 0   | -11.9021 | -33.9854 | -15.1641 |
| 1   | -12.9294 | -35.5643 | -18.2514 |
| 2   | -13.7014 | -34.1149 | -24.0842 |
| 3   | -16.9969 | -36.5728 | -26.4815 |
| 4   | -18.4896 | -33.8641 | -19.173  |
| 5   | -18.5552 | -35.5797 | -14.947  |
| 6   | -16.5891 | -33.381  | -12.4095 |
| 7   | -13.6371 | -33.2918 | -10.8633 |
| 8   | -11.0727 | -36.6749 | -10.0261 |
| 9   | -10.911  | -36.9986 | -9.77736 |
| 10  | -10.0541 | -38.9445 | -10.0809 |
| 11  | -9.99563 | -35.046  | -10.9673 |
| 12  | -9.80333 | -33.9293 | -12.5491 |
| 13  | -10.1059 | -31.1762 | -15.0858 |
| 14  | -10.9418 | -32.5595 | -19.1322 |
| 15  | -11.9619 | -35.5052 | -24.5012 |
| 16  | -14.596  | -36.4348 | -21.7325 |
| 17  | -17.3687 | -31.2721 | -16.8771 |
| 18  | -23.4462 | -35.8328 | -13.8294 |
| 19  | -27.7938 | -36.462  | -11.9135 |
| 20  | -25.716  | -37.5134 | -10.7428 |
| 21  | -18.9434 | -41.8079 | -10.1293 |
| 22  | -17.8613 | -38.3306 | -9.97678 |
| 23  | -15.5988 | -35.2806 | -10.236  |
| 24  | -15.6897 | -33.5346 | -10.8806 |
| 25  | -15.4711 | -33.4639 | -11.8841 |
| 26  | -14.6807 | -33.529  | -13.1719 |
| 27  | -15.3553 | -29.1113 | -14.5106 |
| 28  | -15.6559 | -32.1077 | -15.3755 |
| 29  | -15.0162 | -34.2618 | -15.228  |
| 30  | -13.5822 | -32.3794 | -14.2254 |
| 31  | -13.98   | -31.7298 | -12.9739 |
| 32  | -13.4942 | -32.8315 | -11.8673 |

33 -12.7745 -32.4165 -11.0443  
34 -13.0401 -33.1615 -10.5348  
35 -12.1805 -33.7592 -10.3378  
36 -11.4312 -31.8119 -10.4514  
37 -11.5069 -33.3099 -10.884  
38 -11.9549 -33.9632 -11.6616  
39 -12.4258 -33.7687 -12.8386  
40 -14.353 -34.4986 -14.5212  
41 -14.8274 -33.9745 -16.9252  
42 -17.0755 -34.0207 -20.5654  
43 -19.3656 -35.0525 -27.2144  
44 -23.5816 -32.6164 -41.3463  
45 -30.7325 -30.7005 -25.2165  
46 -29.2247 -32.8627 -20.0742  
47 -25.8164 -32.9108 -17.1497  
48 -20.3738 -33.628 -15.2418  
49 -19.0847 -30.3895 -13.9436  
50 -16.2034 -33.432 -13.0678  
51 -15.4103 -31.2975 -12.5131  
52 -14.1947 -33.427 -12.2191  
53 -13.4512 -31.5779 -12.1476  
54 -13.4152 -31.5829 -12.2736  
55 -14.8664 -33.3229 -12.581  
56 -14.011 -30.8135 -13.0592  
57 -14.9322 -32.2707 -13.7016  
58 -16.1779 -33.3608 -14.5038  
59 -15.8764 -31.3884 -15.4605  
60 -16.3754 -31.7887 -16.5611  
61 -18.0782 -31.4492 -17.7793  
62 -18.2344 -33.2527 -19.0555  
63 -21.3534 -32.058 -20.2692  
64 -19.7655 -31.0457 -21.2255  
65 -18.7703 -31.8002 -21.7159  
66 -17.4109 -32.3054 -21.6669  
67 -17.1544 -31.6108 -21.2066  
68 -15.9739 -31.6984 -20.5445  
69 -17.0707 -32.7028 -19.8437  
70 -14.6827 -32.056 -19.1922  
71 -14.4551 -33.3621 -18.6264  
72 -14.0012 -32.7178 -18.1553  
73 -13.8213 -31.8539 -17.7759  
74 -14.5673 -33.1082 -17.4799  
75 -14.0248 -33.8373 -17.2576  
76 -14.0383 -33.269 -17.099  
77 -14.0096 -33.0861 -16.9946  
78 -13.3664 -31.3545 -16.9359  
79 -13.8535 -32.8757 -16.9149  
80 -14.5558 -31.1259 -16.9244  
81 -14.4122 -34.5815 -16.958  
82 -15.0685 -32.2163 -17.0099  
83 -15.871 -32.9461 -17.075  
84 -15.4966 -32.4935 -17.1489  
85 -15.3851 -32.6606 -17.2276  
86 -16.4877 -34.2014 -17.308

87 -17.155 -30.7459 -17.3875  
88 -18.8328 -32.2794 -17.4638  
89 -18.7166 -32.1084 -17.5355  
90 -19.2919 -32.4429 -17.6015  
91 -21.239 -34.0452 -17.6614  
92 -21.1531 -34.4113 -17.7149  
93 -22.4371 -34.0151 -17.7624  
94 -27.0681 -34.1711 -17.8046  
95 -25.366 -34.3274 -17.8424  
96 -30.6292 -35.7473 -17.8773  
97 -36.4347 -35.025 -17.9109  
98 -35.4109 -33.7371 -17.9451  
99 -31.9822 -34.3855 -17.9823  
100 -41.448 -32.5603 -18.0248  
101 -33.3672 -33.2724 -18.0756  
102 -27.016 -35.2525 -18.1377  
103 -28.2157 -35.9021 -18.2144  
104 -21.8077 -36.0116 -18.3092  
105 -23.1178 -37.2791 -18.4261  
106 -20.5474 -36.3861 -18.5691  
107 -21.1523 -36.562 -18.7422  
108 -19.2193 -35.2789 -18.9499  
109 -19.6806 -37.2102 -19.1964  
110 -20.4186 -38.2344 -19.4857  
111 -20.2147 -38.891 -19.8216  
112 -20.3842 -37.6928 -20.2066  
113 -21.4834 -38.0698 -20.6416  
114 -22.1112 -37.9679 -21.1247  
115 -23.4314 -40.0655 -21.6494  
116 -25.536 -38.9643 -22.2024  
117 -25.4484 -38.0979 -22.7616  
118 -26.6112 -38.0369 -23.2942  
119 -26.3421 -38.3992 -23.7589  
120 -27.0268 -38.3191 -24.1137  
121 -26.4604 -38.7562 -24.3293  
122 -25.9727 -38.6849 -24.4036  
123 -29.3864 -40.1909 -24.3655  
124 -26.7865 -40.502 -24.2672  
125 -27.1894 -41.8804 -24.1698  
126 -26.8834 -42.5755 -24.1317  
127 -26.853 -44.2997 -24.2045  
128 -27.7359 -43.5353 -24.434  
129 -26.8405 -45.7107 -24.863  
130 -26.7985 -43.607 -25.5364  
131 -27.0267 -41.9807 -26.5032  
132 -25.9071 -42.5379 -27.8116  
133 -25.5689 -43.6651 -29.4698  
134 -25.4858 -44.4534 -31.2766  
135 -25.7112 -42.6171 -32.4092  
136 -25.5038 -45.4077 -31.787  
137 -25.8134 -43.2508 -29.9212  
138 -26.2419 -43.8556 -27.9469  
139 -26.8955 -42.1753 -26.3039  
140 -26.8617 -47.1669 -25.0563

141 -26.8253 -43.3789 -24.1796  
142 -27.7196 -43.3704 -23.6416  
143 -28.6007 -44.2693 -23.4194  
144 -28.1491 -40.0373 -23.5009  
145 -28.1143 -44.801 -23.884  
146 -27.7395 -39.0182 -24.5757  
147 -28.3914 -38.1407 -25.5904  
148 -28.4337 -39.1229 -26.9477  
149 -27.613 -37.95 -28.6648  
150 -28.3589 -38.163 -30.7348  
151 -26.8956 -36.8964 -33.0715  
152 -27.9246 -40.4824 -35.4148  
153 -27.8433 -40.6946 -37.3512  
154 -28.9296 -39.5225 -38.7459  
155 -28.9096 -42.3186 -40.0444  
156 -27.651 -41.0243 -41.7143  
157 -29.0494 -44.3936 -43.0482  
158 -30.068 -45.478 -41.5128  
159 -28.7024 -38.1241 -38.1301  
160 -29.149 -45.753 -35.149  
161 -29.7745 -44.8747 -32.9525  
162 -30.173 -43.3799 -31.4579  
163 -30.2376 -42.1414 -30.571  
164 -29.7311 -38.2452 -30.2386  
165 -29.9621 -39.8337 -30.4489  
166 -29.7108 -42.0057 -31.2335  
167 -29.6326 -38.8042 -32.6849  
168 -31.3632 -40.4478 -35.0067  
169 -31.8856 -39.9597 -38.6768  
170 -30.7999 -40.2633 -45.1089  
171 -29.3863 -40.5049 -53.0407  
172 -30.7776 -40.1275 -44.5001  
173 -31.6248 -39.7816 -40.6544  
174 -32.1543 -42.1015 -39.1166  
175 -30.9006 -41.4303 -38.9697  
176 -31.7706 -46.1368 -39.9563  
177 -32.5959 -46.3222 -41.9619  
178 -32.4753 -43.6823 -44.2407  
179 -32.0468 -48.7528 -44.1796  
180 -32.367 -54.0383 -41.8631

Figure8

|      |          |          |          |
|------|----------|----------|----------|
| 13.5 | 15.33764 | 16.01361 | 15.84887 |
| 14   | 15.61206 | 16.29429 | 16.82917 |
| 15.1 | 15.91817 | 16.59037 | 17.74556 |

Figure9(a)

|      |          |          |          |          |          |          |          |
|------|----------|----------|----------|----------|----------|----------|----------|
| -180 | -26.3553 | -26.8755 | -21.5546 | -20.8004 | -21.4765 | -17.9104 | -17.5199 |
| -179 | -23.5126 | -30.4174 | -22.3937 | -21.4574 | -20.5333 | -18.1412 | -16.9981 |
| -178 |          | -31.5295 | -23.6125 | -22.5942 | -19.3242 | -18.4752 | -16.7551 |
| -178 | -22.2104 |          |          |          |          |          |          |
| -177 | -21.9801 |          |          |          |          |          |          |
| -177 |          | -28.1255 | -24.4156 | -24.4217 | -18.2559 | -18.9234 | -16.757  |
| -176 | -22.703  | -25.0825 | -23.8354 | -27.1708 | -17.4974 | -19.5482 | -16.9514 |
| -175 | -24.4224 | -23.2196 | -22.249  | -30.4155 | -17.0786 | -20.4613 | -17.282  |
| -174 | -27.1466 | -22.3417 | -20.6525 | -30.3846 | -16.9677 | -21.8231 | -17.7073 |
| -173 | -29.5106 | -22.3416 | -19.4801 | -27.1151 | -17.0996 | -23.8599 | -18.2235 |
| -172 | -28.0269 | -23.2603 | -18.8027 | -24.4069 | -17.3851 | -26.87   | -18.8792 |
| -171 | -25.0699 |          |          |          |          |          |          |
| -171 |          | -25.3535 | -18.5786 | -22.7335 | -17.7264 | -30.5933 | -19.7777 |
| -170 | -22.9581 | -29.4158 | -18.7204 | -21.9475 | -18.053  | -30.6661 | -21.0759 |
| -169 | -21.8192 | -38.0491 | -19.0862 | -21.9713 | -18.3648 | -27.0286 | -23.0034 |
| -168 | -21.5273 |          |          |          |          |          |          |
| -168 |          | -33.7323 | -19.4642 | -22.8504 | -18.7455 | -24.1498 | -25.9216 |
| -167 | -21.9961 | -27.122  | -19.6266 | -24.8175 | -19.339  | -22.3767 | -30.2046 |
| -166 | -23.1095 | -23.7467 | -19.4845 | -28.5845 | -20.3263 | -21.4931 | -32.4345 |
| -165 | -24.4104 |          |          |          |          |          |          |
| -165 |          | -21.8859 | -19.1749 | -37.2026 | -21.9431 | -21.389  | -28.311  |
| -164 | -24.6507 | -21.0094 | -18.9454 | -36.7409 | -24.584  | -22.075  | -24.7526 |
| -163 | -23.1476 | -20.9268 | -19.0182 | -28.1997 | -29.153  | -23.7118 | -22.5584 |
| -162 | -21.0873 |          |          |          |          |          |          |
| -162 |          | -21.595  | -19.571  | -24.3205 | -36.7441 | -26.7816 | -21.3574 |
| -161 | -19.39   | -23.0638 | -20.7934 | -22.1838 | -31.1699 | -33.0075 | -20.9559 |
| -160 | -18.281  | -25.4115 | -23.0038 | -21.0835 | -25.6893 | -43.7388 | -21.3039 |
| -159 | -17.7811 |          |          |          |          |          |          |
| -159 |          | -28.2276 | -26.9906 | -20.7677 | -22.6823 | -30.3991 | -22.4782 |
| -158 | -17.9024 | -28.8324 | -36.0928 | -21.149  | -20.9887 | -25.4676 | -24.7543 |
| -157 | -18.7091 | -26.3271 | -34.5237 | -22.2211 | -20.1943 | -22.8454 | -28.9565 |
| -156 | -20.3777 |          |          |          |          |          |          |
| -156 |          | -23.8072 | -26.2698 | -23.9941 | -20.1528 | -21.4214 | -38.726  |
| -155 | -23.3613 | -22.1328 | -22.4385 | -26.2382 | -20.8584 | -20.8343 | -34.898  |
| -154 | -29.1447 | -21.2488 | -20.2775 | -27.6224 | -22.4438 | -20.9475 | -27.487  |
| -153 | -40.3981 |          |          |          |          |          |          |
| -153 |          | -21.0521 | -19.1103 | -26.5117 | -25.2977 | -21.7218 | -23.9425 |
| -152 | -27.7663 | -21.4794 | -18.6963 | -24.365  | -30.562  | -23.1459 | -21.9793 |
| -151 | -22.5198 | -22.467  | -18.9629 | -22.6342 | -37.9823 | -25.0563 | -20.9916 |
| -150 | -19.6608 |          |          |          |          |          |          |
| -150 |          | -23.8071 | -19.9482 | -21.5963 | -29.8204 | -26.5352 | -20.7623 |
| -149 | -17.9892 | -24.8175 | -21.8291 | -21.2446 | -24.8598 | -25.9617 | -21.2264 |
| -148 | -17.112  | -24.4783 | -25.0756 | -21.5787 | -22.1119 | -23.9264 | -22.402  |
| -147 | -16.8749 |          |          |          |          |          |          |
| -147 |          | -22.9496 | -30.9881 | -22.6669 | -20.5509 | -21.9693 | -24.3146 |
| -146 | -17.2343 | -21.2612 | -34.8383 | -24.6769 | -19.8146 | -20.5701 | -26.5801 |
| -145 | -18.231  | -19.9483 | -27.2906 | -27.7807 | -19.7697 | -19.765  | -27.1506 |
| -144 | -20.0165 |          |          |          |          |          |          |
| -144 |          | -19.143  | -23.0056 | -30.4068 | -20.4016 | -19.5322 | -24.8624 |
| -143 | -22.9731 | -18.869  | -20.5058 | -27.8824 | -21.7933 | -19.8825 | -22.1098 |
| -142 | -28.1497 | -19.1526 | -19.028  | -24.0487 | -24.1227 | -20.8952 | -19.9507 |

-141 -35.2661  
 -141 -20.0642 -18.2764 -21.2286 -27.3383 -22.7831 -18.4248  
 -140 -27.8817 -21.7489 -18.1325 -19.2872 -28.505 -26.1121 -17.438  
 -139 -22.8493 -24.4087 -18.5745 -17.9978 -25.0659 -32.9927 -16.9183  
 -138 -19.9435  
 -138 -27.4876 -19.6637 -17.2216 -21.5153 -39.5943 -16.8284  
 -137 -18.1474 -26.638 -21.5767 -16.8781 -18.9105 -27.8238 -17.1635  
 -136 -17.0767 -22.642 -24.6858 -16.9182 -17.0486 -22.9006 -17.9524  
 -135 -16.5631  
 -135 -19.2916 -29.1683 -17.3023 -15.7377 -19.9222 -19.2661  
 -134 -16.5351 -16.824 -29.0059 -17.97 -14.8596 -17.9127 -21.2276  
 -133 -16.9814 -15.0037 -23.9424 -18.7783 -14.3437 -16.5128 -23.9472  
 -132 -13.6625 -20.1839 -19.4076 -14.1494 -15.5477 -26.7379  
 -132 -17.946  
 -131 -19.5499 -12.6968 -17.5676 -19.3896 -14.2563 -14.9164 -26.2527  
 -130 -22.0532 -12.0409 -15.6806 -18.5142 -14.6595 -14.5505 -22.9804  
 -129 -25.9427  
 -129 -11.6523 -14.2974 -17.0932 -15.3673 -14.3949 -19.9811  
 -128 -30.2249 -11.5022 -13.2912 -15.554 -16.398 -14.3956 -17.6841  
 -127 -26.813 -11.5703 -12.5856 -14.1322 -17.7664 -14.49 -15.9378  
 -126 -11.8402 -12.1317 -12.9077 -19.4314 -14.6011 -14.5982  
 -126 -22.0553  
 -125 -18.7585 -12.2937 -11.8969 -11.8908 -21.1123 -14.6405 -13.5659  
 -124 -16.3986 -12.9027 -11.8595 -11.068 -21.9777 -14.5252 -12.7729  
 -123 -13.614 -12.0047 -10.4199 -21.2223 -14.207 -12.1699  
 -123 -14.6345  
 -122 -13.2828 -14.3273 -12.3228 -9.92679 -19.4145 -13.6926 -11.7191  
 -121 -12.2368 -14.8783 -12.8076 -9.57085 -17.4745 -13.0344 -11.3898  
 -120 -15.0694 -13.4538 -9.33585 -15.759 -12.3018 -11.1553  
 -120 -11.4293  
 -119 -10.8148 -14.7832 -14.2538 -9.20697 -14.3201 -11.5556 -10.9918  
 -118 -10.3608 -14.0785 -15.1903 -9.17014 -13.1289 -10.8385 -10.8773  
 -117 -13.1321 -16.2224 -9.21152 -12.1445 -10.1753 -10.7913  
 -117 -10.0433  
 -116 -9.84355 -12.1128 -17.2603 -9.3169 -11.3304 -9.57812 -10.7154  
 -115 -9.74672 -11.1256 -18.1362 -9.4712 -10.6566 -9.05055 -10.6339  
 -114 -10.2204 -18.6194 -9.65814 -10.0991 -8.59143 -10.5347  
 -114 -9.74049  
 -113 -9.81442 -9.41477 -18.5416 -9.86014 -9.63801 -8.19679 -10.4097  
 -112 -9.95944 -8.71004 -17.9449 -10.0587 -9.25723 -7.86128 -10.2551  
 -111 -8.10036 -17.0351 -10.2353 -8.9431 -7.57884 -10.0712  
 -111 -10.1674  
 -110 -10.4308 -7.57713 -16.0164 -10.3727 -8.68399 -7.34326 -9.86113  
 -109 -10.7424 -7.13106 -15.0131 -10.4572 -8.4699 -7.1483 -9.63029  
 -108 -6.75305 -14.0815 -10.4799 -8.29213 -6.98795 -9.38474  
 -108 -11.0952  
 -107 -11.4823 -6.43452 -13.2401 -10.4379 -8.14308 -6.85642 -9.13058  
 -106 -11.8964 -6.16752 -12.4894 -10.3343 -8.0161 -6.74821 -8.87328  
 -105 -5.94471 -11.8226 -10.1766 -7.90538 -6.65817 -8.61735  
 -105 -12.3298  
 -104 -12.7746 -5.75931 -11.2307 -9.97558 -7.80589 -6.58148 -8.36626  
 -103 -13.2222 -5.60503 -10.7044 -9.74268 -7.71327 -6.51371 -8.12251  
 -102 -5.47604 -10.235 -9.48899 -7.62382 -6.4508 -7.8877  
 -102 -13.6637

|      |          |          |          |          |          |          |          |
|------|----------|----------|----------|----------|----------|----------|----------|
| -101 | -14.0897 | -5.36689 | -9.81493 | -9.22416 | -7.53439 | -6.38911 | -7.66277 |
| -100 | -14.491  | -5.27252 | -9.43743 | -8.95602 | -7.44239 | -6.32541 | -7.44811 |
| -99  |          | -5.18823 | -9.09679 | -8.69057 | -7.34567 | -6.2569  | -7.24372 |
| -99  | -14.8584 |          |          |          |          |          |          |
| -98  | -15.1834 | -5.10968 | -8.78819 | -8.43215 | -7.24249 | -6.18118 | -7.04937 |
| -97  | -15.4586 | -5.03289 | -8.50763 | -8.18373 | -7.13146 | -6.0963  | -6.86465 |
| -96  |          | -4.95432 | -8.25186 | -7.94719 | -7.01147 | -6.00068 | -6.6891  |
| -96  | -15.6775 |          |          |          |          |          |          |
| -95  | -15.835  | -4.87085 | -8.0183  | -7.72359 | -6.88166 | -5.89315 | -6.52225 |
| -94  | -15.927  | -4.77983 | -7.80502 | -7.51336 | -6.74137 | -5.77292 | -6.36367 |
| -93  |          | -4.67915 | -7.61068 | -7.31648 | -6.59007 | -5.6395  | -6.21298 |
| -93  | -15.9497 |          |          |          |          |          |          |
| -92  | -15.9002 | -4.56724 | -7.43451 | -7.13258 | -6.42742 | -5.49276 | -6.06991 |
| -91  | -15.7751 | -4.4431  | -7.2763  | -6.96104 | -6.25317 | -5.33286 | -5.93423 |
| -90  |          | -4.30634 | -7.13639 | -6.80096 | -6.06721 | -5.16024 | -5.80581 |
| -90  | -15.5717 |          |          |          |          |          |          |
| -89  | -15.2874 |          |          |          |          |          |          |
| -89  |          | -4.15715 | -7.01565 | -6.65124 | -5.86958 | -4.97563 | -5.68455 |
| -88  | -14.9213 | -3.99632 | -6.91551 | -6.5105  | -5.66051 | -4.78001 | -5.57038 |
| -87  |          | -3.82518 | -6.838   | -6.37704 | -5.44041 | -4.57462 | -5.46317 |
| -87  | -14.4743 |          |          |          |          |          |          |
| -86  | -13.9501 |          |          |          |          |          |          |
| -86  |          | -3.64561 | -6.78576 | -6.24882 | -5.20994 | -4.36097 | -5.3627  |
| -85  | -13.3552 | -3.45994 | -6.76213 | -6.12332 | -4.97007 | -4.14084 | -5.26857 |
| -84  | -12.6988 | -3.27091 | -6.77119 | -5.99753 | -4.7221  | -3.91623 | -5.18009 |
| -83  | -11.9921 |          |          |          |          |          |          |
| -83  |          | -3.08163 | -6.8179  | -5.86792 | -4.46768 | -3.68944 | -5.09619 |
| -82  | -11.2474 | -2.8955  | -6.90825 | -5.73039 | -4.2089  | -3.46297 | -5.01529 |
| -81  | -10.477  | -2.71613 | -7.04946 | -5.5804  | -3.94827 | -3.23961 | -4.93515 |
| -80  | -9.69292 |          |          |          |          |          |          |
| -80  |          | -2.54731 | -7.25022 | -5.41315 | -3.68879 | -3.02232 | -4.85281 |
| -79  | -8.9061  | -2.39292 | -7.52113 | -5.22387 | -3.4339  | -2.81429 | -4.76445 |
| -78  | -8.12631 | -2.25686 | -7.87512 | -5.00826 | -3.18753 | -2.61888 | -4.66544 |
| -77  | -7.36215 |          |          |          |          |          |          |
| -77  |          | -2.14298 | -8.32809 | -4.763   | -2.95412 | -2.43959 | -4.55044 |
| -76  | -6.62109 | -2.05496 | -8.89959 | -4.48627 | -2.7386  | -2.27999 | -4.41371 |
| -75  | -5.90967 | -1.99616 | -9.61325 | -4.17819 | -2.54646 | -2.14371 | -4.24957 |
| -74  | -5.23371 |          |          |          |          |          |          |
| -74  |          | -1.96948 | -10.496  | -3.84109 | -2.38376 | -2.03427 | -4.05307 |
| -73  | -4.59848 | -1.977   | -11.5723 | -3.47953 | -2.25727 | -1.95502 | -3.82079 |
| -72  | -4.00891 | -2.01964 | -12.8414 | -3.10009 | -2.1745  | -1.90892 | -3.55159 |
| -71  | -3.46976 |          |          |          |          |          |          |
| -71  |          | -2.09657 | -14.2039 | -2.71094 | -2.144   | -1.89827 | -3.24717 |
| -70  | -2.98579 | -2.20446 | -15.2868 | -2.32136 | -2.17553 | -1.9243  | -2.91229 |
| -69  | -2.56192 | -2.33648 | -15.378  | -1.94126 | -2.28054 | -1.98659 | -2.55461 |
| -68  | -2.20337 |          |          |          |          |          |          |
| -68  |          | -2.48124 | -14.161  | -1.58069 | -2.47272 | -2.08229 | -2.18421 |
| -67  | -1.91587 | -2.62191 | -12.2292 | -1.24961 | -2.76887 | -2.20502 | -1.81287 |
| -66  | -1.70577 | -2.7361  | -10.2101 | -0.95768 | -3.19029 | -2.3437  | -1.45345 |
| -65  | -1.58034 |          |          |          |          |          |          |
| -65  |          | -2.79748 | -8.35935 | -0.71413 | -3.76489 | -2.48134 | -1.11928 |
| -64  | -1.54799 | -2.77993 | -6.73299 | -0.52775 | -4.53068 | -2.59464 | -0.82387 |
| -63  | -1.6186  | -2.66397 | -5.3245  | -0.40685 | -5.54171 | -2.65536 | -0.58083 |
| -62  | -1.80398 |          |          |          |          |          |          |



|     |          |          |          |          |          |          |          |
|-----|----------|----------|----------|----------|----------|----------|----------|
| -62 |          | -2.44329 | -4.11397 | -0.35911 | -6.87828 | -2.63449 | -0.40401 |
| -61 | -2.11841 | -2.1281  | -3.08247 | -0.39133 | -8.6635  | -2.50935 | -0.30791 |
| -60 | -2.57926 | -1.74335 | -2.21536 | -0.50871 | -11.0758 | -2.27138 | -0.30831 |
| -59 | -3.20775 |          |          |          |          |          |          |
| -59 |          | -1.32281 | -1.50257 | -0.71368 | -14.192  | -1.93047 | -0.42327 |
| -58 | -4.02928 | -0.90247 | -0.93821 | -1.00346 | -16.4287 | -1.51341 | -0.67451 |
| -57 | -5.07213 | -0.51581 | -0.52003 | -1.36611 | -14.229  | -1.05725 | -1.08966 |
| -56 | -6.36005 | -0.19163 | -0.24927 | -1.77433 | -10.6022 | -0.60183 | -1.70596 |
| -55 | -7.8845  | 0.04613  | -0.13055 | -2.17785 | -7.64574 | -0.18448 | -2.57673 |
| -54 | -9.51792 | 0.17765  | -0.17218 | -2.49924 | -5.36814 | 0.16213  | -3.78395 |
| -53 | -10.8323 | 0.18627  | -0.38669 | -2.64429 | -3.59492 | 0.40956  | -5.46511 |
| -52 | -11.1247 | 0.05818  | -0.79186 | -2.53697 | -2.20482 | 0.53191  | -7.87839 |
| -51 | -10.2454 | -0.21677 | -1.4122  | -2.16373 | -1.12305 | 0.5033   | -11.5815 |
| -50 | -8.8552  | -0.64184 | -2.28095 | -1.58582 | -0.30424 | 0.29476  | -17.5827 |
| -49 | -7.52374 | -1.20531 | -3.44205 | -0.90582 | 0.27821  | -0.13003 | -17.3748 |
| -48 | -6.47176 | -1.8639  | -4.94836 | -0.22443 | 0.63798  | -0.82123 | -11.0221 |
| -47 | -5.75331 | -2.51567 | -6.83872 | 0.38098  | 0.7788   | -1.85494 | -6.98034 |
| -46 | -5.37218 | -2.97929 | -9.01883 | 0.85675  | 0.69556  | -3.35836 | -4.24882 |
| -45 | -5.31883 | -3.03958 | -10.8521 | 1.16497  | 0.37403  | -5.57318 | -2.2821  |
| -44 | -5.57017 | -2.59802 | -11.0039 | 1.27468  | -0.21087 | -9.05615 | -0.8342  |
| -43 | -6.06038 | -1.77181 | -9.49092 | 1.15432  | -1.09874 | -15.6069 | 0.21893  |
| -42 | -6.61091 | -0.78882 | -7.66507 | 0.76424  | -2.34977 | -21.4805 | 0.94374  |
| -41 | -6.85104 | 0.1596   | -6.174   | 0.04689  | -4.05249 | -11.2331 | 1.37494  |
| -40 | -6.35655 | 0.95929  | -5.12663 | -1.09061 | -6.31918 | -6.33008 | 1.52666  |
| -39 | -5.10584 | 1.55024  | -4.49755 | -2.81533 | -9.15594 | -3.30454 | 1.39694  |
| -38 | -3.50997 | 1.89807  | -4.23881 | -5.47757 | -11.6142 | -1.23168 | 0.96814  |
| -37 | -1.95599 | 1.97507  | -4.28811 | -10.0413 | -11.1155 | 0.22858  | 0.20368  |
| -36 | -0.63839 | 1.74781  | -4.53999 | -21.9261 | -8.61685 | 1.23198  | -0.96015 |
| -35 | 0.36575  | 1.16563  | -4.79752 | -15.1399 | -6.35808 | 1.85608  | -2.63094 |
| -34 | 1.02001  | 0.14357  | -4.76248 | -7.45097 | -4.74584 | 2.13715  | -4.98937 |
| -33 | 1.28813  | -1.47422 | -4.19232 | -3.55069 | -3.70819 | 2.08425  | -8.2919  |
| -32 | 1.1087   | -4.01472 | -3.13842 | -1.06814 | -3.1458  | 1.68317  | -12.1574 |
| -31 | 0.36318  | -8.36148 | -1.889   | 0.60866  | -2.97398 | 0.89334  | -12.1228 |
| -30 | -1.19712 | -19.1959 | -0.71856 | 1.72244  | -3.09804 | -0.36408 | -8.56765 |
| -29 | -4.19346 | -15.0886 | 0.20687  | 2.38541  | -3.36912 | -2.23504 | -5.70996 |
| -28 | -10.9355 | -6.73545 | 0.79368  | 2.64791  | -3.54471 | -5.00008 | -3.82115 |
| -27 | -14.4691 | -2.72779 | 0.96858  | 2.52197  | -3.34246 | -9.18746 | -2.6606  |
| -26 | -3.41561 | -0.24902 | 0.63608  | 1.98724  | -2.65093 | -14.1394 | -2.06453 |
| -25 | 1.91436  | 1.37017  | -0.37398 | 0.98499  | -1.64807 | -11.318  | -1.92732 |
| -24 | 5.45841  | 2.38616  | -2.4231  | -0.6045  | -0.62638 | -6.88803 | -2.15221 |
| -23 | 8.09483  | 2.91267  | -6.43033 | -3.02294 | 0.18736  | -4.09847 | -2.59131 |
| -22 | 10.15459 | 2.99487  | -12.8861 | -6.80581 | 0.64926  | -2.40421 | -2.97866 |
| -21 | 11.79715 | 2.6327   | -5.77401 | -12.9987 | 0.64597  | -1.46917 | -2.95862 |
| -20 | 13.11052 | 1.78253  | 0.46193  | -13.7678 | 0.03457  | -1.126   | -2.3547  |
| -19 | 14.14719 | 0.33958  | 4.50948  | -7.75711 | -1.43916 | -1.27566 | -1.37722 |
| -18 | 14.93965 | -1.91738 | 7.45751  | -4.21614 | -4.30463 | -1.81523 | -0.39436 |
| -17 | 15.50787 | -5.49477 | 9.73154  | -2.1575  | -9.03185 | -2.5427  | 0.31955  |
| -16 | 15.86312 | -11.6924 | 11.53109 | -1.02743 | -6.85435 | -3.04871 | 0.5942   |
| -15 | 16.01    | -15.0742 | 12.96369 | -0.58968 | -0.5279  | -2.85287 | 0.2832   |
| -14 | 15.94723 | -8.01548 | 14.09253 | -0.73007 | 3.85976  | -1.93844 | -0.82461 |
| -13 | 15.66765 | -4.06186 | 14.95648 | -1.36217 | 7.03956  | -0.78651 | -3.12482 |
| -12 | 15.15739 | -1.84694 | 15.57964 | -2.31841 | 9.47312  | 0.15869  | -7.04107 |
| -11 | 14.39388 | -0.66197 | 15.9761  | -3.16547 | 11.38642 | 0.65391  | -7.09045 |
| -10 | 13.34198 | -0.22969 | 16.15247 | -3.20413 | 12.90155 | 0.54262  | -1.10576 |

|    |          |          |          |          |          |          |          |
|----|----------|----------|----------|----------|----------|----------|----------|
| -9 | 11.94653 | -0.4276  | 16.10896 | -2.23844 | 14.09013 | -0.36831 | 3.5027   |
| -8 | 10.11691 | -1.17549 | 15.83956 | -0.89669 | 14.99629 | -2.4342  | 6.84389  |
| -7 | 7.69133  | -2.30967 | 15.33124 | 0.22165  | 15.64763 | -6.12428 | 9.38352  |
| -6 | 4.33775  | -3.33518 | 14.562   | 0.83582  | 16.06068 | -7.16791 | 11.36652 |
| -5 | -0.81871 | -3.37326 | 13.49697 | 0.79506  | 16.24386 | -1.3349  | 12.92653 |
| -4 | -11.7796 | -2.22352 | 12.08081 | -0.08623 | 16.19874 | 3.43067  | 14.14208 |
| -3 | -8.51062 | -0.72    | 10.22186 | -2.1761  | 15.92033 | 6.86324  | 15.0617  |
| -2 | -1.57419 | 0.47278  | 7.75543  | -6.07319 | 15.39634 | 9.45023  | 15.71592 |
| -1 | 1.41333  | 1.09582  | 4.34112  | -7.46644 | 14.6052  | 11.45454 | 16.12345 |
| 0  | 2.86223  | 1.01732  | -0.92496 | -1.28617 | 13.51211 | 13.01929 | 16.29429 |
| 1  | 3.38373  | 0.04938  | -12.0851 | 3.57764  | 12.06113 | 14.22833 | 16.23126 |
| 2  | 3.19158  | -2.22484 | -7.87699 | 7.02374  | 10.15879 | 15.13352 | 15.93036 |
| 3  | 2.34038  | -6.6408  | -1.33214 | 9.59769  | 7.63543  | 15.7677  | 15.38009 |
| 4  | 0.77267  | -8.01721 | 1.53473  | 11.57777 | 4.13599  | 16.15124 | 14.55948 |
| 5  | -1.71938 | -1.13025 | 2.90979  | 13.11281 | -1.30545 | 16.29552 | 13.4341  |
| 6  | -5.68753 | 3.7746   | 3.37246  | 14.2895  | -13.3769 | 16.20452 | 11.94808 |
| 7  | -12.801  | 7.18233  | 3.12715  | 15.16141 | -7.54807 | 15.87535 | 10.00732 |
| 8  | -15.9968 | 9.70766  | 2.2242   | 15.76266 | -1.25548 | 15.29761 | 7.43985  |
| 9  | -8.56761 | 11.63943 | 0.60334  | 16.11475 | 1.50668  | 14.45159 | 3.88217  |
| 10 | -5.01919 | 13.12893 | -1.94472 | 16.23008 | 2.81772  | 13.30441 | -1.67609 |
| 11 | -3.27599 | 14.26375 | -5.95799 | 16.1138  | 3.23442  | 11.80242 | -14.9513 |
| 12 | -2.63165 | 15.09813 | -12.7749 | 15.76429 | 2.95525  | 9.85521  | -7.81112 |
| 13 | -2.85888 | 15.66685 | -14.5231 | 15.17284 | 2.03099  | 7.29807  | -1.48754 |
| 14 | -3.93677 | 15.99219 | -8.23966 | 14.32201 | 0.40879  | 3.78551  | 1.25092  |
| 15 | -5.99026 | 16.08755 | -4.96586 | 13.18231 | -2.09359 | -1.62866 | 2.54595  |
| 16 | -9.1334  | 15.95935 | -3.34116 | 11.70565 | -5.89276 | -14.336  | 2.95833  |
| 17 | -11.5718 | 15.6077  | -2.77003 | 9.8117   | -11.4938 | -9.18447 | 2.69118  |
| 18 | -8.97684 | 15.02622 | -3.05425 | 7.35708  | -12.7097 | -2.251   | 1.80516  |
| 19 | -5.32218 | 14.20091 | -4.1855  | 4.05186  | -8.05484 | 0.63981  | 0.27047  |
| 20 | -2.67278 | 13.10757 | -6.29305 | -0.83969 | -5.12232 | 2.02026  | -2.03254 |
| 21 | -0.89307 | 11.7068  | -9.44004 | -10.4917 | -3.6111  | 2.50873  | -5.31006 |
| 22 | 0.22728  | 9.93405  | -11.4997 | -12.6488 | -3.09096 | 2.33224  | -9.3789  |
| 23 | 0.81193  | 7.67822  | -8.63421 | -3.8165  | -3.40081 | 1.57393  | -10.6431 |
| 24 | 0.92204  | 4.72879  | -5.03583 | -0.45013 | -4.54388 | 0.24067  | -7.81765 |
| 25 | 0.57457  | 0.61482  | -2.4209  | 1.18265  | -6.65113 | -1.70854 | -5.36909 |
| 26 | -0.25199 | -6.10012 | -0.63436 | 1.86443  | -9.7626  | -4.29549 | -3.97904 |
| 27 | -1.62    | -17.3924 | 0.5261   | 1.87723  | -11.6632 | -7.14462 | -3.47043 |
| 28 | -3.62929 | -6.70908 | 1.18182  | 1.33857  | -8.71888 | -8.48057 | -3.73953 |
| 29 | -6.30326 | -2.2624  | 1.39707  | 0.29296  | -5.10852 | -7.22884 | -4.80331 |
| 30 | -8.73933 | -0.11121 | 1.197    | -1.24453 | -2.45418 | -5.42599 | -6.80677 |
| 31 | -8.12242 | 0.92489  | 0.57467  | -3.22189 | -0.60033 | -4.17318 | -9.93897 |
| 32 | -5.32025 | 1.24233  | -0.50986 | -5.34865 | 0.65419  | -3.6019  | -12.7535 |
| 33 | -2.7649  | 1.0103   | -2.13465 | -6.73068 | 1.43359  | -3.69121 | -10.2607 |
| 34 | -0.85799 | 0.30748  | -4.40239 | -6.49538 | 1.80857  | -4.46101 | -6.28475 |
| 35 | 0.50141  | -0.82498 | -7.23004 | -5.30778 | 1.81496  | -6.02596 | -3.3296  |
| 36 | 1.42922  | -2.33823 | -9.1517  | -4.16463 | 1.4625   | -8.65375 | -1.24144 |
| 37 | 2.00885  | -4.08453 | -7.67763 | -3.43858 | 0.73704  | -12.6154 | 0.22379  |
| 38 | 2.29893  | -5.63353 | -4.85184 | -3.20412 | -0.40272 | -14.4594 | 1.21576  |
| 39 | 2.34363  | -6.26332 | -2.48051 | -3.47917 | -2.03245 | -10.0962 | 1.82238  |
| 40 | 2.18099  | -5.75646 | -0.7225  | -4.30505 | -4.2612  | -6.14102 | 2.09475  |
| 41 | 1.85026  | -4.74325 | 0.53931  | -5.7877  | -7.114   | -3.38545 | 2.05993  |
| 42 | 1.39915  | -3.80634 | 1.41119  | -8.15603 | -9.65236 | -1.43595 | 1.72673  |
| 43 | 0.89032  | -3.17599 | 1.96777  | -11.825  | -9.04332 | -0.04505 | 1.08707  |
| 44 | 0.4033   | -2.91057 | 2.26089  | -16.0167 | -6.27282 | 0.9269   | 0.11364  |

|    |          |          |          |          |          |          |          |
|----|----------|----------|----------|----------|----------|----------|----------|
| 45 | 0.02447  | -3.02248 | 2.32831  | -13.4266 | -3.74371 | 1.56236  | -1.24669 |
| 46 | -0.17894 | -3.52639 | 2.19994  | -8.82203 | -1.83071 | 1.91173  | -3.08501 |
| 47 | -0.18826 | -4.46011 | 1.90279  | -5.58739 | -0.4284  | 2.0057   | -5.54054 |
| 48 | -0.0406  | -5.90313 | 1.46553  | -3.31474 | 0.57966  | 1.8612   | -8.70981 |
| 49 | 0.19386  | -8.00437 | 0.92342  | -1.6696  | 1.2765   | 1.48419  | -11.6687 |
| 50 | 0.44279  | -10.9989 | 0.32317  | -0.46797 | 1.7192   | 0.87019  | -10.9715 |
| 51 | 0.65007  | -14.7474 | -0.27397 | 0.39678  | 1.94796  | 0.00278  | -7.91739 |
| 52 | 0.77945  | -15.4343 | -0.79559 | 0.99072  | 1.99231  | -1.15038 | -5.26252 |
| 53 | 0.81085  | -11.7336 | -1.17275 | 1.35699  | 1.87526  | -2.64592 | -3.28389 |
| 54 | 0.73556  | -8.35944 | -1.36374 | 1.52461  | 1.61612  | -4.58145 | -1.82474 |
| 55 | 0.55246  | -5.88956 | -1.37164 | 1.51328  | 1.23287  | -7.12785 | -0.75009 |
| 56 | 0.26586  | -4.06676 | -1.24013 | 1.33594  | 0.74432  | -10.5679 | 0.03074  |
| 57 | -0.11528 | -2.69771 | -1.03128 | 1.00027  | 0.17242  | -14.9171 | 0.57855  |
| 58 | -0.57709 | -1.66319 | -0.80339 | 0.50928  | -0.45546 | -16.1022 | 0.93563  |
| 59 |          | -0.88756 | -0.60013 | -0.13865 | -1.10449 | -12.3361 | 1.13265  |
| 59 | -1.09982 |          |          |          |          |          |          |
| 60 | -1.65663 | -0.3203  | -0.44934 | -0.95028 | -1.73209 | -9.02285 | 1.19278  |
| 61 | -2.21292 | 0.07396  | -0.36633 | -1.93883 | -2.29098 | -6.6691  | 1.13429  |
| 62 |          | 0.32099  | -0.35778 | -3.1265  | -2.7373  | -4.96362 | 0.97218  |
| 62 | -2.72786 |          |          |          |          |          |          |
| 63 | -3.1595  | 0.44022  | -0.4248  | -4.54904 | -3.04199 | -3.69667 | 0.71939  |
| 64 | -3.47367 | 0.44674  | -0.56506 | -6.26443 | -3.19975 | -2.74336 | 0.38762  |
| 65 |          | 0.35254  | -0.77404 | -8.37056 | -3.22951 | -2.02571 | -0.01203 |
| 65 | -3.65359 |          |          |          |          |          |          |
| 66 | -3.70467 | 0.16734  | -1.04572 | -11.0439 | -3.16579 | -1.492   | -0.46849 |
| 67 | -3.65115 | -0.10081 | -1.37301 | -14.6291 | -3.04712 | -1.10603 | -0.9703  |
| 68 |          | -0.44516 | -1.74786 | -19.7338 | -2.90736 | -0.84121 | -1.50524 |
| 68 | -3.52698 |          |          |          |          |          |          |
| 69 | -3.36638 | -0.85995 | -2.16136 | -23.7686 | -2.77197 | -0.67725 | -2.06019 |
| 70 | -3.19789 | -1.34019 | -2.60375 | -19.2788 | -2.65791 | -0.59808 | -2.62109 |
| 71 |          | -1.88146 | -3.06451 | -15.2173 | -2.57512 | -0.59059 | -3.1733  |
| 71 | -3.04233 |          |          |          |          |          |          |
| 72 | -2.91327 | -2.47982 | -3.53258 | -12.5318 | -2.52843 | -0.6438  | -3.70233 |
| 73 | -2.81847 | -3.13162 | -3.99671 | -10.6462 | -2.5192  | -0.7483  | -4.19486 |
| 74 |          | -3.8334  | -4.44602 | -9.2558  | -2.5465  | -0.89585 | -4.64002 |
| 74 | -2.76146 |          |          |          |          |          |          |
| 75 | -2.74287 | -4.58177 | -4.87069 | -8.19917 | -2.60801 | -1.07913 | -5.03056 |
| 76 | -2.76138 | -5.37323 | -5.26274 | -7.38214 | -2.70056 | -1.29157 | -5.36355 |
| 77 |          | -6.20407 | -5.61669 | -6.7452  | -2.82053 | -1.52719 | -5.64046 |
| 77 | -2.81445 |          |          |          |          |          |          |
| 78 | -2.89875 | -7.07009 | -5.92995 | -6.24831 | -2.96411 | -1.78053 | -5.86647 |
| 79 | -3.0105  | -7.96641 | -6.20287 | -5.86315 | -3.12745 | -2.04662 | -6.04935 |
| 80 |          | -8.88717 | -6.43839 | -5.56887 | -3.30678 | -2.32089 | -6.19808 |
| 80 | -3.14567 |          |          |          |          |          |          |
| 81 | -3.30013 | -9.8252  | -6.64137 | -5.34964 | -3.4985  | -2.59922 | -6.32179 |
| 82 | -3.46977 | -10.7716 | -6.81785 | -5.19317 | -3.69919 | -2.87787 | -6.42888 |
| 83 |          | -11.7155 | -6.9743  | -5.0897  | -3.9057  | -3.15349 | -6.52658 |
| 83 | -3.65055 |          |          |          |          |          |          |
| 84 | -3.83864 | -12.6434 | -7.11705 | -5.0314  | -4.11514 | -3.42313 | -6.62077 |
| 85 | -4.03039 | -13.5393 | -7.25187 | -5.01196 | -4.3249  | -3.68424 | -6.71608 |
| 86 |          | -14.3848 | -7.38378 | -5.02627 | -4.53267 | -3.93462 | -6.81594 |
| 86 | -4.22251 |          |          |          |          |          |          |
| 87 | -4.41202 |          |          |          |          |          |          |
| 87 |          | -15.1594 | -7.51695 | -5.07019 | -4.73644 | -4.17244 | -6.92286 |

88 -4.59639 -15.8417 -7.65474 -5.14047 -4.9345 -4.3962 -7.03858  
89 -16.4112 -7.79973 -5.23459 -5.12544 -4.60473 -7.16427  
89 -4.77357  
90 -4.94203  
90 -16.8501 -7.95387 -5.35073 -5.30813 -4.79715 -7.30067  
91 -5.10081 -17.1452 -8.11849 -5.48768 -5.48176 -4.97287 -7.44819  
92 -5.24954 -17.2895 -8.29438 -5.64485 -5.64577 -5.13155 -7.60698  
93 -5.38847  
93 -17.2835 -8.48181 -5.82226 -5.79995 -5.27313 -7.77701  
94 -5.51845 -17.1343 -8.68051 -6.02052 -5.94433 -5.39781 -7.958  
95 -5.64093 -16.8552 -8.88957 -6.24088 -6.07931 -5.50605 -8.14947  
96 -5.75794  
96 -16.4638 -9.10737 -6.48525 -6.20558 -5.5986 -8.35059  
97 -5.87204 -15.9805 -9.33137 -6.75627 -6.3242 -5.67654 -8.56016  
98 -5.98629 -15.4263 -9.55796 -7.05741 -6.43658 -5.74126 -8.7764  
99 -6.10423  
99 -14.8212 -9.78223 -7.39307 -6.54452 -5.79455 -8.99679  
100 -6.22978 -14.1835 -9.99784 -7.76878 -6.6502 -5.83857 -9.21785  
101 -6.36727 -13.5292 -10.197 -8.19142 -6.75623 -5.87592 -9.43495  
102 -6.52135  
102 -12.8717 -10.3706 -8.66954 -6.8656 -5.90964 -9.64208  
103 -6.69698 -12.2222 -10.5087 -9.2139 -6.98172 -5.94325 -9.8318  
104 -6.89936 -11.59 -10.6018 -9.83814 -7.10837 -5.98074 -9.99536  
105 -7.13391  
105 -10.9827 -10.6417 -10.5599 -7.24969 -6.02663 -10.1231  
106 -7.40617 -10.4066 -10.6233 -11.4023 -7.41012 -6.08597 -10.2055  
107 -7.72165 -9.86739 -10.5455 -12.3967 -7.59432 -6.16438 -10.2341  
108 -8.08555  
108 -9.36988 -10.4123 -13.587 -7.80708 -6.26812 -10.2032  
109 -8.50236 -8.91869 -10.2323 -15.0362 -8.05311 -6.40414 -10.1112  
110 -8.97499 -8.51833 -10.018 -16.8362 -8.33676 -6.58023 -9.96135  
111 -9.5034  
111 -8.17334 -9.7842 -19.1141 -8.66156 -6.80518 -9.76176  
112 -10.0824 -7.88853 -9.54665 -21.9539 -9.02952 -7.089 -9.52465  
113 -10.6979 -7.66913 -9.32109 -24.6861 -9.43994 -7.44332 -9.26501  
114 -11.3223  
114 -7.52098 -9.12238 -24.4586 -9.8877 -7.8818 -8.99921  
115 -11.9098 -7.45077 -8.96422 -21.5165 -10.3609 -8.42094 -8.74383  
116 -12.3951 -7.46628 -8.85911 -18.6091 -10.8378 -9.08102 -8.51491  
117 -12.7054  
117 -7.57677 -8.81839 -16.2866 -11.2844 -9.88761 -8.32762  
118 -12.7858 -7.79345 -8.85245 -14.459 -11.6549 -10.8736 -8.19629  
119 -12.6294 -8.13022 -8.97074 -13.0104 -11.8984 -12.0817 -8.13472  
120 -12.2833  
120 -8.60474 -9.18157 -11.8602 -11.9744 -13.566 -8.15661  
121 -11.8269 -9.2401 -9.4915 -10.9569 -11.8703 -15.384 -8.27613  
122 -11.3413 -10.0677 -9.90394 -10.2679 -11.6099 -17.5388 -8.50868  
123 -10.8917  
123 -11.1318 -10.4163 -9.77382 -11.2452 -19.7155 -8.87167  
124 -10.5243 -12.4992 -11.015 -9.46448 -10.8389 -20.7262 -9.38561  
125 -10.27 -14.2775 -11.6674 -9.33694 -10.4493 -19.6048 -10.0753  
126 -10.1499  
126 -16.6592 -12.3118 -9.39473 -10.1236 -17.5193 -10.971  
127 -10.1786 -20.0423 -12.8534 -9.64784 -9.89822 -15.5553 -12.1088

|     |          |          |          |          |          |          |          |
|-----|----------|----------|----------|----------|----------|----------|----------|
| 128 | -10.3665 | -25.4239 | -13.1819 | -10.1138 | -9.80155 | -13.9741 | -13.5259 |
| 129 |          | -32.6581 | -13.2227 | -10.82   | -9.85744 | -12.7722 | -15.2354 |
| 129 | -10.7201 |          |          |          |          |          |          |
| 130 | -11.2393 | -26.0913 | -12.9884 | -11.808  | -10.0885 | -11.9064 | -17.1312 |
| 131 | -11.9101 | -21.1582 | -12.575  | -13.1416 | -10.5187 | -11.3409 | -18.7295 |
| 132 | -12.6916 |          |          |          |          |          |          |
| 132 |          | -18.2981 | -12.1078 | -14.9221 | -11.1757 | -11.054  | -19.0936 |
| 133 | -13.4945 | -16.5104 | -11.6942 | -17.3167 | -12.092  | -11.0373 | -18.0248 |
| 134 | -14.1672 | -15.4124 | -11.4098 | -20.5863 | -13.303  | -11.2947 | -16.4326 |
| 135 |          | -14.8364 | -11.3053 | -24.7525 | -14.8326 | -11.8429 | -14.9782 |
| 135 | -14.5297 |          |          |          |          |          |          |
| 136 | -14.4861 | -14.7089 | -11.4171 | -26.3853 | -16.6339 | -12.7138 | -13.859  |
| 137 | -14.1132 | -15.0101 | -11.7761 | -23.1447 | -18.4053 | -13.9595 | -13.0999 |
| 138 |          | -15.7636 | -12.4141 | -20.12   | -19.3536 | -15.6584 | -12.6891 |
| 138 | -13.6003 |          |          |          |          |          |          |
| 139 | -13.1288 | -17.0449 | -13.3659 | -18.1295 | -18.8549 | -17.9141 | -12.6162 |
| 140 | -12.8214 | -19.0182 | -14.6653 | -16.9304 | -17.5097 | -20.7664 | -12.8827 |
| 141 |          | -22.0547 | -16.3167 | -16.349  | -16.1473 | -23.5738 | -13.5051 |
| 141 | -12.7518 |          |          |          |          |          |          |
| 142 | -12.9675 | -27.2197 | -18.1873 | -16.3021 | -15.1078 | -23.9645 | -14.5173 |
| 143 | -13.5075 | -40.1404 | -19.7402 | -16.77   | -14.4679 | -21.9443 | -15.9714 |
| 144 |          | -31.128  | -20.0568 | -17.7872 | -14.2337 | -19.9115 | -17.9245 |
| 144 | -14.4107 |          |          |          |          |          |          |
| 145 | -15.7144 | -24.8437 | -19.0904 | -19.4519 | -14.4061 | -18.5377 | -20.3451 |
| 146 | -17.4222 | -21.8183 | -17.7697 | -21.9506 | -14.9988 | -17.8149 | -22.6921 |
| 147 |          | -20.2097 | -16.7004 | -25.4986 | -16.043  | -17.6777 | -23.3912 |
| 147 | -19.3708 |          |          |          |          |          |          |
| 148 | -20.9023 | -19.5121 | -16.0643 | -28.9654 | -17.5823 | -18.0956 | -22.1087 |
| 149 | -21.0128 | -19.5531 | -15.8978 | -27.5814 | -19.6267 | -19.0752 | -20.4872 |
| 150 |          | -20.3084 | -16.2138 | -24.3232 | -21.9339 | -20.638  | -19.3409 |
| 150 | -19.8992 |          |          |          |          |          |          |
| 151 | -18.6193 | -21.8674 | -17.0368 | -22.0789 | -23.4494 | -22.7155 | -18.7969 |
| 152 | -17.7204 | -24.4502 | -18.4071 | -20.8333 | -22.9885 | -24.7305 | -18.8417 |
| 153 |          | -28.2321 | -20.3394 | -20.3974 | -21.5041 | -25.1776 | -19.4579 |
| 153 | -17.3463 |          |          |          |          |          |          |
| 154 | -17.5335 | -30.5425 | -22.604  | -20.6837 | -20.2344 | -23.814  | -20.6251 |
| 155 | -18.319  | -27.2891 | -24.1067 | -21.6834 | -19.5448 | -22.1855 | -22.2286 |
| 156 |          | -23.9164 | -23.5394 | -23.4064 | -19.4831 | -21.0707 | -23.7739 |
| 156 | -19.7673 |          |          |          |          |          |          |
| 157 | -21.9346 | -21.7576 | -21.9241 | -25.6024 | -20.0517 | -20.6133 | -24.2068 |
| 158 | -24.53   | -20.5531 | -20.5775 | -26.8162 | -21.2486 | -20.829  | -23.2241 |
| 159 |          | -20.1139 | -19.867  | -25.4212 | -22.9737 | -21.7432 | -21.8479 |
| 159 | -25.768  |          |          |          |          |          |          |
| 160 | -24.2181 | -20.3676 | -19.8426 | -23.0854 | -24.6429 | -23.3804 | -20.8251 |
| 161 | -22.0664 | -21.3373 | -20.5276 | -21.2137 | -24.8808 | -25.5148 | -20.387  |
| 162 |          | -23.1631 | -21.9743 | -20.0232 | -23.4751 | -26.7413 | -20.6044 |
| 162 | -20.5661 |          |          |          |          |          |          |
| 163 | -19.8574 | -26.2194 | -24.1776 | -19.4698 | -21.8145 | -25.3519 | -21.5489 |
| 164 | -19.9206 | -31.6203 | -26.4492 | -19.5032 | -20.6532 | -22.9473 | -23.3408 |
| 165 |          | -42.2504 | -26.4365 | -20.0972 | -20.1582 | -20.9843 | -26.0436 |
| 165 | -20.7867 |          |          |          |          |          |          |
| 166 | -22.5861 | -33.6315 | -24.1985 | -21.2292 | -20.3743 | -19.6916 | -28.5232 |
| 167 | -25.5324 | -28.4492 | -22.0753 | -22.796  | -21.3868 | -19.0143 | -27.287  |
| 168 |          | -25.9332 | -20.7322 | -24.3678 | -23.4084 | -18.8786 | -24.1992 |

168 -29.0326  
169 -28.4036 -24.6761 -20.1871 -24.9731 -26.92 -19.2145 -21.7955  
170 -24.8867 -24.1367 -20.4273 -24.1493 -32.2286 -19.9199 -20.2637  
171 -23.9504 -21.5322 -22.7512 -31.114 -20.782 -19.4488  
171 -22.3169  
172 -20.869 -23.7814 -23.7704 -21.5306 -26.0759 -21.4008 -19.2197  
173 -20.352 -23.397 -27.9419 -20.6993 -22.9762 -21.3549 -19.4603  
174 -20.6981 -22.8124 -37.5036 -20.2396 -21.2151 -20.6526 -20.0068  
175 -21.9913 -22.2459 -34.4431 -20.0644 -20.3638 -19.7002 -20.5643  
176 -24.5696 -21.9394 -27.0798 -20.0666 -20.2016 -18.8463 -20.7149  
177 -22.0776 -23.7215 -20.1503 -20.5631 -18.2401 -20.2224  
177 -29.5666  
178 -45.823  
178 -22.8144 -22.028 -20.2687 -21.2071 -17.9065 -19.2964  
179 -32.5726 -24.3301 -21.384 -20.452 -21.6865 -17.8144 -18.3154  
180 -26.3553 -26.8755 -21.5546 -20.8004 -21.4765 -17.9104 -17.5199

Figure9(b)

|      |          |          |          |          |          |          |          |
|------|----------|----------|----------|----------|----------|----------|----------|
| -180 | -25.0257 | -22.5357 | -21.2217 | -19.6413 | -19.5305 | -20.4568 | -17.7663 |
| -179 | -22.6554 | -25.8053 | -21.5713 | -19.2758 | -18.8366 | -20.384  | -17.9453 |
| -178 |          | -32.2091 | -21.8788 | -19.5031 | -18.1856 | -19.8403 | -18.4001 |
| -178 | -21.6175 |          |          |          |          |          |          |
| -177 | -21.5359 |          |          |          |          |          |          |
| -177 |          | -37.1869 | -21.6387 | -20.438  | -17.7837 | -19.1279 | -18.994  |
| -176 | -22.2284 | -28.3646 | -20.7821 | -22.3047 | -17.7426 | -18.5779 | -19.454  |
| -175 | -23.4285 | -24.1955 | -19.7393 | -25.6588 | -18.0981 | -18.4063 | -19.4818 |
| -174 | -24.3811 | -22.0559 | -18.9294 | -32.5425 | -18.8043 | -18.7528 | -19.0399 |
| -173 | -23.9919 | -21.1283 | -18.5687 | -43.1411 | -19.6648 | -19.7585 | -18.4094 |
| -172 | -22.5046 | -21.1672 | -18.7538 | -29.1398 | -20.2477 | -21.6595 | -17.9216 |
| -171 | -21.0297 |          |          |          |          |          |          |
| -171 |          | -22.179  | -19.5338 | -24.6057 | -20.0987 | -25.0054 | -17.8012 |
| -170 | -20.1156 | -24.4341 | -20.8878 | -22.379  | -19.2969 | -31.7477 | -18.1964 |
| -169 | -19.9279 | -28.8879 | -22.4872 | -21.4348 | -18.355  | -43.3351 | -19.2568 |
| -168 | -20.5806 |          |          |          |          |          |          |
| -168 |          | -41.532  | -23.1965 | -21.4959 | -17.6814 | -28.8435 | -21.2334 |
| -167 | -22.3039 | -33.5025 | -22.0788 | -22.5752 | -17.4789 | -24.2359 | -24.7207 |
| -166 | -25.6633 | -26.3923 | -20.1988 | -24.9896 | -17.8659 | -21.978  | -31.9553 |
| -165 | -31.5524 |          |          |          |          |          |          |
| -165 |          | -23.0826 | -18.6293 | -29.8838 | -18.9814 | -21.0125 | -40.8857 |
| -164 | -29.9511 | -21.3484 | -17.6728 | -42.1288 | -21.0972 | -21.0538 | -27.7339 |
| -163 | -23.9628 | -20.6236 | -17.3809 | -30.9304 | -24.9172 | -22.1092 | -23.3254 |
| -162 | -20.4367 |          |          |          |          |          |          |
| -162 |          | -20.7101 | -17.797  | -24.9989 | -33.3741 | -24.4736 | -21.1341 |
| -161 | -18.3652 | -21.5432 | -19.0475 | -21.9188 | -34.8958 | -29.0712 | -20.1877 |
| -160 | -17.2715 | -23.0669 | -21.4649 | -20.1905 | -25.635  | -35.4794 | -20.2166 |
| -159 | -16.9768 |          |          |          |          |          |          |
| -159 |          | -24.9046 | -26.0486 | -19.3514 | -21.7452 | -28.5987 | -21.2199 |
| -158 | -17.4582 | -25.6267 | -37.9435 | -19.2139 | -19.7235 | -23.4695 | -23.4337 |
| -157 | -18.8404 | -24.1516 | -29.7106 | -19.6886 | -18.824  | -20.5106 | -27.3977 |
| -156 | -21.5226 |          |          |          |          |          |          |
| -156 |          | -21.9618 | -23.0081 | -20.6919 | -18.8224 | -18.7432 | -31.0764 |
| -155 | -26.8559 | -20.1749 | -19.7081 | -21.99   | -19.7104 | -17.7852 | -26.3655 |
| -154 | -42.8294 | -18.9878 | -17.8925 | -22.914  | -21.656  | -17.4657 | -21.881  |
| -153 | -26.8806 |          |          |          |          |          |          |
| -153 |          | -18.362  | -17.04   | -22.5855 | -24.9603 | -17.698  | -19.0261 |
| -152 | -21.062  | -18.2307 | -16.9782 | -21.2017 | -28.1124 | -18.415  | -17.2194 |
| -151 | -17.9773 | -18.5179 | -17.6978 | -19.6687 | -24.9782 | -19.4839 | -16.1542 |
| -150 | -16.1799 |          |          |          |          |          |          |
| -150 |          | -19.1024 | -19.3297 | -18.4701 | -20.7274 | -20.536  | -15.6784 |
| -149 | -15.233  | -19.749  | -22.1757 | -17.7277 | -17.7801 | -20.8733 | -15.7133 |
| -148 | -14.9749 | -20.0822 | -26.1187 | -17.4466 | -15.8149 | -20.1055 | -16.2089 |
| -147 | -15.3712 |          |          |          |          |          |          |
| -147 |          | -19.8029 | -25.6294 | -17.6035 | -14.5563 | -18.744  | -17.0968 |
| -146 | -16.4889 | -19.0142 | -21.0199 | -18.154  | -13.8525 | -17.4248 | -18.1921 |
| -145 | -18.5311 | -18.0893 | -17.5228 | -18.9896 | -13.6206 | -16.4319 | -19.0316 |
| -144 | -21.9198 |          |          |          |          |          |          |
| -144 |          | -17.3329 | -15.1403 | -19.8357 | -13.8138 | -15.8416 | -18.9711 |
| -143 | -26.3857 | -16.9062 | -13.5274 | -20.1914 | -14.3954 | -15.6646 | -17.9381 |
| -142 | -24.4309 | -16.8956 | -12.4849 | -19.6753 | -15.3018 | -15.8995 | -16.5311 |

-141 -19.5268  
-141 -17.3775 -11.9019 -18.5182 -16.36 -16.5426 -15.2422  
-140 -16.1283 -18.471 -11.7156 -17.2317 -17.1625 -17.566 -14.2627  
-139 -13.8148 -20.4166 -11.8883 -16.1359 -17.1582 -18.834 -13.6386  
-138 -12.2161  
-138 -23.7971 -12.3919 -15.3542 -16.2469 -19.9053 -13.3727  
-137 -11.1353 -30.4048 -13.186 -14.9245 -14.9139 -20.0011 -13.4628  
-136 -10.4625 -32.39 -14.1732 -14.8641 -13.6148 -18.881 -13.9132  
-135 -10.1328  
-135 -23.9711 -15.1192 -15.1991 -12.5506 -17.2284 -14.7349  
-134 -10.1055 -19.4211 -15.6089 -15.9832 -11.7766 -15.6474 -15.9288  
-133 -10.3527 -16.5017 -15.2968 -17.3254 -11.2968 -14.3549 -17.4191  
-132 -14.4606 -14.3109 -19.4529 -11.1031 -13.3875 -18.8486  
-132 -10.8492  
-131 -11.5587 -12.9917 -13.0736 -22.894 -11.189 -12.7316 -19.3525  
-130 -12.4095 -11.9435 -11.8949 -28.9862 -11.5545 -12.367 -18.3589  
-129 -13.2564  
-129 -11.2315 -10.9065 -30.8375 -12.2057 -12.2795 -16.5569  
-128 -13.8549 -10.8062 -10.1443 -23.4727 -13.1514 -12.4642 -14.7371  
-127 -13.9431 -10.6392 -9.60804 -19.0507 -14.386 -12.9276 -13.1831  
-126 -10.7165 -9.28665 -16.138 -15.8342 -13.689 -11.933  
-126 -13.4521  
-125 -12.572 -11.0365 -9.16828 -14.0455 -17.2037 -14.7832 -10.9606  
-124 -11.5602 -11.6093 -9.24341 -12.4761 -17.835 -16.2581 -10.2303  
-123 -12.4592 -9.5057 -11.2771 -17.1964 -18.148 -9.71116  
-123 -10.5889  
-122 -9.7381 -13.6284 -9.95174 -10.3595 -15.6826 -20.3121 -9.37841  
-121 -9.03412 -15.1818 -10.5798 -9.66676 -13.9808 -21.8703 -9.21304  
-120 -17.1987 -11.3866 -9.16042 -12.4246 -21.2765 -9.20068  
-120 -8.47847  
-119 -8.06296 -19.6669 -12.3601 -8.81298 -11.0961 -19.0707 -9.33059  
-118 -7.77625 -21.8745 -13.4621 -8.60392 -9.99004 -16.7342 -9.59488  
-117 -21.6783 -14.5931 -8.51733 -9.07942 -14.7391 -9.98784  
-117 -7.60658  
-116 -7.54269 -19.2025 -15.5444 -8.54043 -8.33574 -13.1028 -10.5052  
-115 -7.57409 -16.5421 -16.0083 -8.66247 -7.73396 -11.7629 -11.143  
-114 -14.3163 -15.7746 -8.87398 -7.25305 -10.6589 -11.8961  
-114 -7.6909  
-113 -7.8836 -12.5109 -14.9486 -9.16599 -6.87551 -9.74339 -12.7544  
-112 -8.14266 -11.0341 -13.827 -9.52937 -6.58664 -8.9805 -13.6977  
-111 -9.8092 -12.6503 -9.95398 -6.3739 -8.34264 -14.6846  
-111 -8.4582  
-110 -8.81946 -8.78027 -11.5396 -10.4278 -6.2264 -7.80825 -15.6386  
-109 -9.21448 -7.90678 -10.5377 -10.9358 -6.13453 -7.36006 -16.4368  
-108 -7.15878 -9.65151 -11.4592 -6.08964 -6.98389 -16.9282  
-108 -9.62966  
-107 -10.0496 -6.51352 -8.87342 -11.9742 -6.08381 -6.66787 -17.0034  
-106 -10.4572 -5.95329 -8.19144 -12.4528 -6.10969 -6.40187 -16.6708  
-105 -5.46395 -7.59299 -12.8644 -6.16036 -6.17711 -16.0481  
-105 -10.8346  
-104 -11.1639 -5.03403 -7.06634 -13.1803 -6.22923 -5.98587 -15.2791  
-103 -11.4301 -4.65405 -6.60104 -13.3789 -6.30998 -5.8213 -14.4728  
-102 -4.31604 -6.188 -13.4518 -6.39651 -5.67729 -13.6926  
-102 -11.622



|      |          |          |          |          |          |          |          |
|------|----------|----------|----------|----------|----------|----------|----------|
| -101 | -11.7349 | -4.01332 | -5.81934 | -13.4052 | -6.48295 | -5.54839 | -12.969  |
| -100 | -11.7705 | -3.74017 | -5.48829 | -13.2578 | -6.56365 | -5.42968 | -12.3135 |
| -99  |          | -3.49173 | -5.18907 | -13.0351 | -6.63319 | -5.31683 | -11.7281 |
| -99  | -11.7362 |          |          |          |          |          |          |
| -98  | -11.6435 | -3.26387 | -4.91673 | -12.7639 | -6.6865  | -5.206   | -11.2102 |
| -97  | -11.5056 | -3.05309 | -4.66711 | -12.4679 | -6.71883 | -5.09384 | -10.7559 |
| -96  |          | -2.85648 | -4.43673 | -12.1659 | -6.7259  | -4.97751 | -10.3606 |
| -96  | -11.3355 |          |          |          |          |          |          |
| -95  | -11.1447 | -2.67163 | -4.22274 | -11.8719 | -6.70398 | -4.85468 | -10.0206 |
| -94  | -10.9425 | -2.49664 | -4.0229  | -11.5952 | -6.64994 | -4.7235  | -9.73249 |
| -93  |          | -2.33006 | -3.8355  | -11.3416 | -6.56135 | -4.58263 | -9.49386 |
| -93  | -10.7358 |          |          |          |          |          |          |
| -92  | -10.529  | -2.17087 | -3.65937 | -11.1141 | -6.43657 | -4.43124 | -9.30318 |
| -91  | -10.3241 | -2.0185  | -3.49383 | -10.9133 | -6.27474 | -4.26897 | -9.15984 |
| -90  |          | -1.87277 | -3.3387  | -10.7378 | -6.0759  | -4.09597 | -9.06414 |
| -90  | -10.1214 |          |          |          |          |          |          |
| -89  | -9.91897 |          |          |          |          |          |          |
| -89  |          | -1.73393 | -3.19424 | -10.5843 | -5.84087 | -3.91289 | -9.01733 |
| -88  | -9.7135  | -1.60262 | -3.06119 | -10.4477 | -5.57133 | -3.72083 | -9.02162 |
| -87  |          | -1.47991 | -2.94072 | -10.3204 | -5.26969 | -3.52134 | -9.08019 |
| -87  | -9.49992 |          |          |          |          |          |          |
| -86  | -9.27191 |          |          |          |          |          |          |
| -86  |          | -1.36725 | -2.83447 | -10.1925 | -4.93904 | -3.31642 | -9.19717 |
| -85  | -9.02219 | -1.26654 | -2.74448 | -10.0514 | -4.58306 | -3.10852 | -9.37759 |
| -84  | -8.7431  | -1.18012 | -2.67325 | -9.88247 | -4.20589 | -2.90047 | -9.6271  |
| -83  | -8.42731 |          |          |          |          |          |          |
| -83  |          | -1.11076 | -2.62372 | -9.66937 | -3.81206 | -2.69552 | -9.95139 |
| -82  | -8.06876 | -1.06174 | -2.59925 | -9.39615 | -3.40636 | -2.49731 | -10.3548 |
| -81  | -7.66352 | -1.03684 | -2.60367 | -9.04945 | -2.9938  | -2.30989 | -10.8375 |
| -80  | -7.21056 |          |          |          |          |          |          |
| -80  |          | -1.04041 | -2.64122 | -8.62118 | -2.57947 | -2.1377  | -11.3891 |
| -79  | -6.71213 | -1.0774  | -2.71659 | -8.11038 | -2.16856 | -1.98567 | -11.9772 |
| -78  | -6.17361 | -1.15349 | -2.83482 | -7.52377 | -1.76628 | -1.85917 | -12.5281 |
| -77  | -5.60303 |          |          |          |          |          |          |
| -77  |          | -1.27509 | -3.00121 | -6.87451 | -1.37787 | -1.76417 | -12.907  |
| -76  | -5.01022 | -1.44952 | -3.22104 | -6.17993 | -1.00861 | -1.70728 | -12.9315 |
| -75  | -4.40596 | -1.68504 | -3.49913 | -5.45894 | -0.66382 | -1.69595 | -12.462  |
| -74  | -3.80122 |          |          |          |          |          |          |
| -74  |          | -1.99098 | -3.83883 | -4.72994 | -0.34893 | -1.73861 | -11.5147 |
| -73  | -3.20655 | -2.37764 | -4.2403  | -4.0096  | -0.06951 | -1.84501 | -10.2488 |
| -72  | -2.63181 | -2.85599 | -4.69733 | -3.31233 | 0.16863  | -2.02654 | -8.84691 |
| -71  | -2.08597 |          |          |          |          |          |          |
| -71  |          | -3.43656 | -5.19198 | -2.65032 | 0.35939  | -2.29681 | -7.43764 |
| -70  | -1.57716 | -4.12672 | -5.68653 | -2.03394 | 0.49626  | -2.67228 | -6.09064 |
| -69  | -1.11271 | -4.92404 | -6.1147  | -1.47216 | 0.57218  | -3.17322 | -4.8378  |
| -68  | -0.69931 |          |          |          |          |          |          |
| -68  |          | -5.80161 | -6.38025 | -0.97309 | 0.57944  | -3.82476 | -3.69126 |
| -67  | -0.34309 | -6.67956 | -6.37867 | -0.54447 | 0.50955  | -4.65765 | -2.65414 |
| -66  | -0.04968 | -7.3874  | -6.0468  | -0.19407 | 0.3531   | -5.70695 | -1.72598 |
| -65  | 0.17574  |          |          |          |          |          |          |
| -65  |          | -7.67059 | -5.40502 | 0.06975  | 0.09978  | -7.00157 | -0.90545 |
| -64  | 0.32863  | -7.33709 | -4.54561 | 0.23762  | -0.26137 | -8.51961 | -0.19152 |
| -63  | 0.40536  | -6.4462  | -3.58109 | 0.29853  | -0.74109 | -10.0376 | 0.41586  |
| -62  | 0.40387  |          |          |          |          |          |          |

|     |          |          |          |          |          |          |          |
|-----|----------|----------|----------|----------|----------|----------|----------|
| -62 |          | -5.24993 | -2.60376 | 0.23912  | -1.34749 | -10.8554 | 0.91554  |
| -61 | 0.32474  | -3.98633 | -1.67484 | 0.04259  | -2.08022 | -10.1684 | 1.30494  |
| -60 | 0.17311  | -2.79524 | -0.8303  | -0.31276 | -2.91729 | -8.33504 | 1.57992  |
| -59 | -0.03857 |          |          |          |          |          |          |
| -59 |          | -1.74076 | -0.08986 | -0.85579 | -3.78866 | -6.25413 | 1.73461  |
| -58 | -0.28658 | -0.84801 | 0.53598  | -1.62598 | -4.53794 | -4.35366 | 1.76118  |
| -57 | -0.53198 | -0.12591 | 1.04162  | -2.67845 | -4.91573 | -2.72973 | 1.64963  |
| -56 | -0.71935 | 0.42156  | 1.42398  | -4.09003 | -4.7047  | -1.37659 | 1.38766  |
| -55 | -0.78388 | 0.79008  | 1.68147  | -5.95612 | -3.9239  | -0.26908 | 0.96084  |
| -54 | -0.6708  | 0.97218  | 1.81394  | -8.30691 | -2.81245 | 0.61572  | 0.35407  |
| -53 | -0.36079 | 0.95532  | 1.8235   | -10.5655 | -1.62042 | 1.29404  | -0.44378 |
| -52 | 0.1176   | 0.71966  | 1.71644  | -10.5814 | -0.50121 | 1.77533  | -1.42633 |
| -51 | 0.69976  | 0.23491  | 1.50664  | -8.09118 | 0.47395  | 2.06276  | -2.53432 |
| -50 | 1.31009  | -0.54487 | 1.22069  | -5.33888 | 1.27809  | 2.15376  | -3.58229 |
| -49 | 1.88119  | -1.68995 | 0.90428  | -3.07654 | 1.90387  | 2.04014  | -4.19288 |
| -48 | 2.36055  | -3.30835 | 0.62596  | -1.31283 | 2.3517   | 1.70827  | -3.98119 |
| -47 | 2.7087   | -5.55237 | 0.46997  | 0.03643  | 2.62498  | 1.13975  | -2.99467 |
| -46 | 2.89422  | -8.47969 | 0.50956  | 1.03844  | 2.72913  | 0.31513  | -1.65448 |
| -45 | 2.88829  | -10.8211 | 0.76911  | 1.73615  | 2.67286  | -0.77248 | -0.31618 |
| -44 | 2.65944  | -9.27452 | 1.20652  | 2.15337  | 2.47184  | -2.07287 | 0.85395  |
| -43 | 2.1675   | -5.97088 | 1.73416  | 2.29917  | 2.15492  | -3.36018 | 1.80134  |
| -42 | 1.35491  | -3.2178  | 2.25622  | 2.1704   | 1.7729   | -4.08049 | 2.51626  |
| -41 | 0.13091  | -1.16841 | 2.69248  | 1.75322  | 1.40589  | -3.66431 | 3.00369  |
| -40 | -1.66306 | 0.32163  | 2.9827   | 1.02548  | 1.15799  | -2.32341 | 3.27265  |
| -39 | -4.34547 | 1.36342  | 3.0807   | -0.03373 | 1.12403  | -0.72304 | 3.33398  |
| -38 | -8.71371 | 2.02304  | 2.94572  | -1.40643 | 1.33667  | 0.73616  | 3.20256  |
| -37 | -17.3445 | 2.33465  | 2.5334   | -2.90719 | 1.74094  | 1.92428  | 2.90315  |
| -36 | -14.3089 | 2.30962  | 1.78528  | -3.91634 | 2.22559  | 2.82057  | 2.48059  |
| -35 | -7.3595  | 1.94187  | 0.61271  | -3.57904 | 2.67466  | 3.43532  | 2.01265  |
| -34 | -3.70386 | 1.21301  | -1.13534 | -2.05833 | 2.99554  | 3.78453  | 1.61613  |
| -33 | -1.47317 | 0.10704  | -3.7509  | -0.25104 | 3.12006  | 3.88421  | 1.42279  |
| -32 | -0.08432 | -1.33347 | -7.89476 | 1.34511  | 2.99386  | 3.75231  | 1.51245  |
| -31 | 0.71072  | -2.81946 | -14.6953 | 2.60172  | 2.56328  | 3.41574  | 1.85301  |
| -30 | 1.06037  | -3.51655 | -12.7627 | 3.51413  | 1.76107  | 2.92316  | 2.31933  |
| -29 | 1.12278  | -2.66915 | -6.88246 | 4.10423  | 0.48593  | 2.36322  | 2.76583  |
| -28 | 1.16732  | -0.88264 | -3.51013 | 4.3947   | -1.43689 | 1.87663  | 3.07481  |
| -27 | 1.61643  | 0.93765  | -1.48806 | 4.40536  | -4.3508  | 1.62793  | 3.16211  |
| -26 | 2.79865  | 2.43923  | -0.31533 | 4.15767  | -9.0023  | 1.71331  | 2.96258  |
| -25 | 4.58613  | 3.56106  | 0.24629  | 3.68537  | -14.8443 | 2.07958  | 2.4119   |
| -24 | 6.58046  | 4.31872  | 0.38113  | 3.05371  | -10.3097 | 2.56228  | 1.42645  |
| -23 | 8.4892   | 4.73834  | 0.37288  | 2.3859   | -5.61212 | 2.98785  | -0.12645 |
| -22 | 10.18627 | 4.84251  | 0.72592  | 1.87258  | -2.88342 | 3.22691  | -2.491   |
| -21 | 11.63612 | 4.6514   | 1.93094  | 1.70473  | -1.31697 | 3.19046  | -6.18562 |
| -20 | 12.83828 | 4.1916   | 3.89124  | 1.92932  | -0.53704 | 2.8066   | -12.2071 |
| -19 | 13.80265 | 3.51431  | 6.09621  | 2.39857  | -0.30928 | 1.99558  | -13.5028 |
| -18 | 14.5401  | 2.72655  | 8.18278  | 2.89037  | -0.32148 | 0.63986  | -7.59739 |
| -17 | 15.05921 | 2.02277  | 10.01326 | 3.22505  | 0.0092   | -1.47037 | -4.10163 |
| -16 | 15.36534 | 1.65073  | 11.55945 | 3.2851   | 1.30309  | -4.77933 | -2.14806 |
| -15 | 15.46035 | 1.74386  | 12.82989 | 2.98728  | 3.45175  | -10.4098 | -1.16455 |
| -14 | 15.34261 | 2.183    | 13.84147 | 2.24942  | 5.83493  | -16.245  | -0.84233 |
| -13 | 15.00708 | 2.70681  | 14.6101  | 0.95562  | 8.04948  | -9.26202 | -0.82394 |
| -12 | 14.4454  | 3.08956  | 15.14804 | -1.10126 | 9.96431  | -4.98801 | -0.44835 |
| -11 | 13.64647 | 3.18819  | 15.46344 | -4.37201 | 11.56415 | -2.71948 | 0.98254  |
| -10 | 12.59813 | 2.90901  | 15.5605  | -10.1547 | 12.86708 | -1.59823 | 3.29856  |

|    |          |          |          |          |          |          |          |
|----|----------|----------|----------|----------|----------|----------|----------|
| -9 | 11.29189 | 2.16496  | 15.43979 | -19.5118 | 13.89624 | -1.2242  | 5.79993  |
| -8 | 9.73556  | 0.83371  | 15.09855 | -10.1106 | 14.67164 | -1.17784 | 8.08121  |
| -7 | 7.98308  | -1.30934 | 14.53116 | -5.32953 | 15.20848 | -0.70765 | 10.02965 |
| -6 | 6.19024  | -4.77786 | 13.73011 | -2.94238 | 15.51713 | 0.90747  | 11.64311 |
| -5 | 4.65551  | -11.2618 | 12.68823 | -1.80473 | 15.60372 | 3.37338  | 12.94718 |
| -4 | 3.67821  | -23.3471 | 11.4042  | -1.44578 | 15.47061 | 5.94218  | 13.96933 |
| -3 | 3.22763  | -9.82651 | 9.89499  | -1.37882 | 15.11694 | 8.23992  | 14.73232 |
| -2 | 2.93346  | -5.16478 | 8.2217   | -0.76698 | 14.53925 | 10.18065 | 15.25326 |
| -1 | 2.40062  | -2.90082 | 6.52894  | 1.04899  | 13.73266 | 11.77517 | 15.54403 |
| 0  | 1.32617  | -1.86649 | 5.05664  | 3.61504  | 12.69323 | 13.05493 | 15.61206 |
| 1  | -0.60664 | -1.57898 | 4.01754  | 6.18893  | 11.42329 | 14.05032 | 15.46095 |
| 2  | -3.97233 | -1.49627 | 3.37508  | 8.45294  | 9.94267  | 14.7858  | 15.09107 |
| 3  | -10.0257 | -0.72721 | 2.83804  | 10.34912 | 8.31003  | 15.27966 | 14.50022 |
| 4  | -10.7596 | 1.25541  | 2.0656   | 11.89821 | 6.65219  | 15.54473 | 13.68475 |
| 5  | -3.98462 | 3.86053  | 0.75635  | 13.13506 | 5.16816  | 15.58928 | 12.64173 |
| 6  | 0.00645  | 6.39428  | -1.43804 | 14.09133 | 4.03401  | 15.41772 | 11.37367 |
| 7  | 2.46991  | 8.59701  | -5.14514 | 14.79211 | 3.233    | 15.03113 | 9.89823  |
| 8  | 4.02002  | 10.43273 | -11.0667 | 15.25614 | 2.53049  | 14.42797 | 8.26653  |
| 9  | 4.91938  | 11.92828 | -9.04099 | 15.49671 | 1.61929  | 13.60489 | 6.58906  |
| 10 | 5.29156  | 13.11979 | -3.30366 | 15.52262 | 0.20241  | 12.55862 | 5.04434  |
| 11 | 5.19194  | 14.03907 | 0.21734  | 15.33877 | -2.07085 | 11.28977 | 3.80804  |
| 12 | 4.63411  | 14.71118 | 2.45175  | 14.94679 | -5.79246 | 9.811    | 2.90088  |
| 13 | 3.60092  | 15.15497 | 3.87222  | 14.34544 | -11.1607 | 8.16302  | 2.13201  |
| 14 | 2.05744  | 15.38401 | 4.69631  | 13.53136 | -8.85361 | 6.43998  | 1.21374  |
| 15 | 0.0092   | 15.40751 | 5.03131  | 12.50025 | -3.57322 | 4.8082   | -0.14219 |
| 16 | -2.22365 | 15.23096 | 4.92811  | 11.2497  | -0.19503 | 3.46185  | -2.25846 |
| 17 | -3.37517 | 14.85657 | 4.4031   | 9.78533  | 1.99371  | 2.47865  | -5.63604 |
| 18 | -2.37497 | 14.28367 | 3.44954  | 8.13377  | 3.41344  | 1.71778  | -10.6579 |
| 19 | -0.49504 | 13.50907 | 2.05286  | 6.36659  | 4.26837  | 0.9064   | -10.2252 |
| 20 | 1.12974  | 12.5278  | 0.24393  | 4.63007  | 4.66413  | -0.23476 | -4.94305 |
| 21 | 2.25028  | 11.33467 | -1.70496 | 3.13762  | 4.65596  | -1.98365 | -1.34708 |
| 22 | 2.87731  | 9.92802  | -2.89444 | 2.0508   | 4.27007  | -4.71802 | 1.01132  |
| 23 | 3.0507   | 8.31827  | -2.39937 | 1.31565  | 3.5163   | -9.01066 | 2.57817  |
| 24 | 2.79407  | 6.54607  | -0.88523 | 0.68385  | 2.40358  | -12.5265 | 3.5784   |
| 25 | 2.10921  | 4.7141   | 0.62228  | -0.12608 | 0.97728  | -7.97995 | 4.13195  |
| 26 | 0.98098  | 3.0171   | 1.75509  | -1.3575  | -0.58029 | -3.66725 | 4.30661  |
| 27 | -0.59814 | 1.69648  | 2.46167  | -3.2647  | -1.77873 | -0.82691 | 4.14232  |
| 28 | -2.52194 | 0.8576   | 2.76194  | -6.23364 | -1.96202 | 1.08407  | 3.66524  |
| 29 | -4.22596 | 0.34214  | 2.67857  | -10.801  | -1.13196 | 2.36677  | 2.90108  |
| 30 | -4.49759 | -0.14147 | 2.22313  | -13.2741 | 0.05863  | 3.18093  | 1.89664  |
| 31 | -3.14877 | -0.8491  | 1.39793  | -8.33862 | 1.12801  | 3.61838  | 0.76123  |
| 32 | -1.37467 | -1.97756 | 0.21145  | -4.29754 | 1.90248  | 3.73655  | -0.27385 |
| 33 | 0.1294   | -3.72968 | -1.27028 | -1.61937 | 2.3461   | 3.57576  | -0.86275 |
| 34 | 1.21749  | -6.42319 | -2.78054 | 0.20563  | 2.46285  | 3.1712   | -0.78025 |
| 35 | 1.90021  | -10.6386 | -3.66477 | 1.45237  | 2.26303  | 2.56508  | -0.1715  |
| 36 | 2.2088   | -15.3047 | -3.30358 | 2.27031  | 1.7555   | 1.82296  | 0.62229  |
| 37 | 2.16338  | -11.4483 | -2.03703 | 2.74868  | 0.952    | 1.05328  | 1.3449   |
| 38 | 1.76588  | -6.80103 | -0.60341 | 2.94643  | -0.11386 | 0.41488  | 1.87399  |
| 39 | 0.99577  | -3.75537 | 0.62108  | 2.90784  | -1.33772 | 0.0753   | 2.16547  |
| 40 | -0.19774 | -1.69036 | 1.537    | 2.67267  | -2.45323 | 0.11146  | 2.20852  |
| 41 | -1.91214 | -0.25566 | 2.14008  | 2.28475  | -3.0041  | 0.45037  | 2.00442  |
| 42 | -4.32018 | 0.73265  | 2.44691  | 1.80037  | -2.67831 | 0.93259  | 1.55956  |
| 43 | -7.66216 | 1.38163  | 2.47212  | 1.29469  | -1.70211 | 1.41123  | 0.88724  |
| 44 | -11.4137 | 1.76049  | 2.2216   | 0.85983  | -0.53214 | 1.79208  | 0.01866  |

|    |          |          |          |          |          |          |          |
|----|----------|----------|----------|----------|----------|----------|----------|
| 45 | -10.9593 | 1.91931  | 1.68959  | 0.58555  | 0.54246  | 2.02627  | -0.97185 |
| 46 | -7.27586 | 1.89926  | 0.85527  | 0.5241   | 1.41127  | 2.09258  | -1.9258  |
| 47 | -4.28612 | 1.73939  | -0.32349 | 0.6645   | 2.04892  | 1.98439  | -2.58001 |
| 48 | -2.16438 | 1.4815   | -1.9227  | 0.94251  | 2.45964  | 1.70297  | -2.6756  |
| 49 | -0.65973 | 1.17332  | -4.07697 | 1.27582  | 2.6548   | 1.25532  | -2.18616 |
| 50 | 0.39807  | 0.86844  | -7.02081 | 1.59362  | 2.64481  | 0.65594  | -1.34083 |
| 51 | 1.11244  | 0.6212   | -11.015  | 1.84718  | 2.43619  | -0.06753 | -0.40191 |
| 52 | 1.54778  | 0.47577  | -14.2585 | 2.00774  | 2.03034  | -0.86382 | 0.46908  |
| 53 | 1.7454   | 0.4538   | -11.595  | 2.06067  | 1.42247  | -1.64479 | 1.20153  |
| 54 | 1.73205  | 0.54853  | -7.88101 | 2.0002   | 0.59993  | -2.28078 | 1.7739   |
| 55 | 1.52469  | 0.73005  | -5.19878 | 1.82595  | -0.46057 | -2.63013 | 2.186    |
| 56 | 1.13311  | 0.95787  | -3.29531 | 1.54104  | -1.7983  | -2.61213 | 2.44544  |
| 57 | 0.56154  | 1.19284  | -1.91908 | 1.1513   | -3.47832 | -2.26291 | 2.56177  |
| 58 | -0.19016 | 1.40373  | -0.91946 | 0.66553  | -5.61058 | -1.70421 | 2.54415  |
| 59 |          | 1.56882  | -0.20481 | 0.09649  | -8.38513 | -1.06586 | 2.40039  |
| 59 | -1.12505 |          |          |          |          |          |          |
| 60 | -2.24608 | 1.67466  | 0.28383  | -0.53729 | -12.0941 | -0.44036 | 2.13672  |
| 61 | -3.54833 | 1.71402  | 0.58643  | -1.20915 | -16.4039 | 0.12052  | 1.75766  |
| 62 |          | 1.68399  | 0.73135  | -1.88206 | -16.293  | 0.59323  | 1.26601  |
| 62 | -4.99927 |          |          |          |          |          |          |
| 63 | -6.49367 | 1.58449  | 0.73945  | -2.50839 | -12.4776 | 0.97036  | 0.66282  |
| 64 | -7.78162 | 1.41728  | 0.62661  | -3.0343  | -9.43079 | 1.2528   | -0.05281 |
| 65 |          | 1.18531  | 0.40527  | -3.41104 | -7.26471 | 1.44537  | -0.88391 |
| 65 | -8.47212 |          |          |          |          |          |          |
| 66 | -8.32204 | 0.89228  | 0.08548  | -3.61028 | -5.68626 | 1.55452  | -1.83604 |
| 67 | -7.52586 | 0.54247  | -0.32435 | -3.63444 | -4.50848 | 1.5872   | -2.91785 |
| 68 |          | 0.14064  | -0.81686 | -3.51421 | -3.61905 | 1.55033  | -4.14181 |
| 68 | -6.47041 |          |          |          |          |          |          |
| 69 | -5.41651 | -0.30798 | -1.38523 | -3.29508 | -2.94693 | 1.45054  | -5.52518 |
| 70 | -4.47298 | -0.79768 | -2.02265 | -3.02267 | -2.44446 | 1.29415  | -7.09068 |
| 71 |          | -1.32214 | -2.7218  | -2.734   | -2.07797 | 1.08715  | -8.86564 |
| 71 | -3.6685  |          |          |          |          |          |          |
| 72 | -2.99998 | -1.8744  | -3.47414 | -2.45501 | -1.82258 | 0.83521  | -10.8742 |
| 73 | -2.45411 | -2.44678 | -4.26915 | -2.20184 | -1.65919 | 0.54378  | -13.1035 |
| 74 |          | -3.03087 | -5.09342 | -1.98335 | -1.57263 | 0.2181   | -15.3863 |
| 74 | -2.01553 |          |          |          |          |          |          |
| 75 | -1.66971 | -3.61763 | -5.92975 | -1.80341 | -1.55049 | -0.1367  | -17.1468 |
| 76 | -1.40375 | -4.19759 | -6.75659 | -1.66269 | -1.58238 | -0.51561 | -17.5259 |
| 77 |          | -4.76126 | -7.54824 | -1.55997 | -1.65939 | -0.91366 | -16.582  |
| 77 | -1.20645 |          |          |          |          |          |          |
| 78 | -1.06815 | -5.29968 | -8.27669 | -1.49287 | -1.77377 | -1.32592 | -15.1848 |
| 79 | -0.98052 | -5.80502 | -8.91523 | -1.45848 | -1.91864 | -1.74747 | -13.8592 |
| 80 |          | -6.27132 | -9.44371 | -1.45361 | -2.08787 | -2.1734  | -12.7453 |
| 80 | -0.93631 |          |          |          |          |          |          |
| 81 | -0.92925 | -6.695   | -9.85336 | -1.47505 | -2.27592 | -2.59882 | -11.846  |
| 82 | -0.95383 | -7.07512 | -10.149  | -1.51967 | -2.47781 | -3.0189  | -11.1321 |
| 83 |          | -7.4133  | -10.3473 | -1.58452 | -2.689   | -3.42892 | -10.5727 |
| 83 | -1.00526 |          |          |          |          |          |          |
| 84 | -1.07934 | -7.71338 | -10.4719 | -1.66687 | -2.90541 | -3.82428 | -10.1416 |
| 85 | -1.17243 | -7.98073 | -10.5485 | -1.76425 | -3.12339 | -4.20062 | -9.81827 |
| 86 |          | -8.22158 | -10.6006 | -1.87447 | -3.3397  | -4.5539  | -9.5866  |
| 86 | -1.28139 |          |          |          |          |          |          |
| 87 | -1.40353 |          |          |          |          |          |          |
| 87 |          | -8.44235 | -10.6475 | -1.99563 | -3.55151 | -4.88045 | -9.43424 |

|     |          |          |          |          |          |          |          |
|-----|----------|----------|----------|----------|----------|----------|----------|
| 88  | -1.53664 | -8.64905 | -10.7042 | -2.12614 | -3.75641 | -5.17708 | -9.35176 |
| 89  |          | -8.84696 | -10.7815 | -2.26472 | -3.95241 | -5.44113 | -9.33211 |
| 89  | -1.67891 |          |          |          |          |          |          |
| 90  | -1.82898 |          |          |          |          |          |          |
| 90  |          | -9.04029 | -10.8866 | -2.4104  | -4.13793 | -5.67059 | -9.37015 |
| 91  | -1.98591 | -9.2321  | -11.0246 | -2.56258 | -4.31182 | -5.86408 | -9.46244 |
| 92  | -2.14917 | -9.42413 | -11.1979 | -2.72094 | -4.47337 | -6.02094 | -9.60698 |
| 93  | -2.31869 |          |          |          |          |          |          |
| 93  |          | -9.61676 | -11.4076 | -2.88554 | -4.62228 | -6.14119 | -9.80318 |
| 94  | -2.4948  | -9.80891 | -11.6527 | -3.05678 | -4.75872 | -6.22555 | -10.0518 |
| 95  | -2.67834 | -9.99797 | -11.9302 | -3.23541 | -4.88328 | -6.2754  | -10.3549 |
| 96  | -2.87059 |          |          |          |          |          |          |
| 96  |          | -10.1797 | -12.234  | -3.42256 | -4.99699 | -6.29275 | -10.7162 |
| 97  | -3.07333 | -10.3481 | -12.5546 | -3.61974 | -5.10137 | -6.28017 | -11.1409 |
| 98  | -3.2889  | -10.4958 | -12.8768 | -3.82884 | -5.19838 | -6.24072 | -11.6359 |
| 99  | -3.52018 |          |          |          |          |          |          |
| 99  |          | -10.6138 | -13.1793 | -4.05218 | -5.29046 | -6.17793 | -12.2106 |
| 100 | -3.77069 | -10.6927 | -13.4336 | -4.29252 | -5.38055 | -6.09566 | -12.8763 |
| 101 | -4.04464 | -10.7232 | -13.6058 | -4.55307 | -5.4721  | -5.99813 | -13.6468 |
| 102 | -4.34702 |          |          |          |          |          |          |
| 102 |          | -10.6972 | -13.6612 | -4.83758 | -5.56906 | -5.88979 | -14.5376 |
| 103 | -4.68374 | -10.6097 | -13.5728 | -5.15031 | -5.67599 | -5.77531 | -15.5626 |
| 104 | -5.06176 | -10.4592 | -13.3295 | -5.49614 | -5.79804 | -5.65957 | -16.7246 |
| 105 | -5.48935 |          |          |          |          |          |          |
| 105 |          | -10.2487 | -12.941  | -5.88058 | -5.94104 | -5.54761 | -17.9891 |
| 106 | -5.97637 | -9.98544 | -12.4345 | -6.30986 | -6.1116  | -5.44464 | -19.2213 |
| 107 | -6.5347  | -9.67984 | -11.847  | -6.79088 | -6.31726 | -5.35607 | -20.0955 |
| 108 | -7.1788  |          |          |          |          |          |          |
| 108 |          | -9.3446  | -11.2165 | -7.33121 | -6.56663 | -5.28751 | -20.1606 |
| 109 | -7.92646 | -8.99327 | -10.5763 | -7.93881 | -6.86974 | -5.24487 | -19.2833 |
| 110 | -8.7998  | -8.63936 | -9.9533  | -8.62151 | -7.23841 | -5.23437 | -17.8316 |
| 111 | -9.82624 |          |          |          |          |          |          |
| 111 |          | -8.29556 | -9.36771 | -9.38568 | -7.68681 | -5.2627  | -16.229  |
| 112 | -11.0389 | -7.97352 | -8.83482 | -10.2334 | -8.2324  | -5.33708 | -14.698  |
| 113 | -12.4733 | -7.68374 | -8.36635 | -11.1566 | -8.89721 | -5.46547 | -13.316  |
| 114 | -14.1491 |          |          |          |          |          |          |
| 114 |          | -7.43571 | -7.97185 | -12.1263 | -9.71    | -5.65677 | -12.0981 |
| 115 | -15.9993 | -7.2381  | -7.65977 | -13.0747 | -10.7096 | -5.92113 | -11.0393 |
| 116 | -17.66   | -7.09905 | -7.43837 | -13.8775 | -11.9507 | -6.27031 | -10.1294 |
| 117 | -18.2764 |          |          |          |          |          |          |
| 117 |          | -7.02643 | -7.31645 | -14.3647 | -13.5127 | -6.71825 | -9.35937 |
| 118 | -17.3614 | -7.02806 | -7.30407 | -14.4015 | -15.5126 | -7.28183 | -8.72246 |
| 119 | -15.6447 | -7.11198 | -7.41329 | -13.9952 | -18.1    | -7.98193 | -8.21474 |
| 120 | -13.8929 |          |          |          |          |          |          |
| 120 |          | -7.28668 | -7.65915 | -13.2927 | -21.2211 | -8.84493 | -7.83506 |
| 121 | -12.381  | -7.56125 | -8.06104 | -12.4728 | -23.1012 | -9.90459 | -7.58505 |
| 122 | -11.1551 | -7.94558 | -8.64474 | -11.6682 | -21.082  | -11.204  | -7.46916 |
| 123 | -10.2007 |          |          |          |          |          |          |
| 123 |          | -8.45036 | -9.44569 | -10.9554 | -17.9408 | -12.7947 | -7.49498 |
| 124 | -9.49614 | -9.08687 | -10.5146 | -10.3735 | -15.3711 | -14.7197 | -7.67377 |
| 125 | -9.0251  | -9.86621 | -11.9275 | -9.94184 | -13.4193 | -16.9229 | -8.02147 |
| 126 | -8.77958 |          |          |          |          |          |          |
| 126 |          | -10.7973 | -13.803  | -9.67088 | -11.949  | -18.9175 | -8.56041 |
| 127 | -8.76014 | -11.8821 | -16.3277 | -9.56839 | -10.8583 | -19.4594 | -9.32215 |

|     |          |          |          |          |          |          |          |
|-----|----------|----------|----------|----------|----------|----------|----------|
| 128 | -8.97637 | -13.1057 | -19.7099 | -9.64262 | -10.084  | -18.1659 | -10.3525 |
| 129 |          | -14.4163 | -23.1042 | -9.90421 | -9.5898  | -16.2858 | -11.7205 |
| 129 | -9.44854 |          |          |          |          |          |          |
| 130 | -10.2109 | -15.6974 | -22.1094 | -10.3676 | -9.35791 | -14.6159 | -13.5361 |
| 131 | -11.318  | -16.756  | -18.5936 | -11.0524 | -9.38495 | -13.3284 | -15.9829 |
| 132 | -12.8564 |          |          |          |          |          |          |
| 132 |          | -17.3969 | -15.7871 | -11.9848 | -9.68092 | -12.4156 | -19.3583 |
| 133 | -14.9624 | -17.5835 | -13.8112 | -13.1982 | -10.2708 | -11.844  | -23.6779 |
| 134 | -17.8217 | -17.488  | -12.4594 | -14.7321 | -11.2002 | -11.5891 | -24.7751 |
| 135 |          | -17.3533 | -11.5951 | -16.6173 | -12.548  | -11.6405 | -21.0379 |
| 135 | -21.3364 |          |          |          |          |          |          |
| 136 | -22.9363 | -17.3696 | -11.1437 | -18.8152 | -14.4559 | -12.003  | -17.8757 |
| 137 | -20.3563 | -17.6598 | -11.0716 | -21.0145 | -17.2075 | -12.6986 | -15.7658 |
| 138 |          | -18.3113 | -11.3761 | -22.3499 | -21.4924 | -13.7718 | -14.4133 |
| 138 | -17.4207 |          |          |          |          |          |          |
| 139 | -15.3259 | -19.4084 | -12.0839 | -22.1628 | -29.6079 | -15.3022 | -13.6319 |
| 140 | -13.9686 | -21.0536 | -13.2599 | -21.1699 | -30.0817 | -17.4341 | -13.3262 |
| 141 |          | -23.3622 | -15.034  | -20.2578 | -22.49   | -20.4502 | -13.4561 |
| 141 | -13.2026 |          |          |          |          |          |          |
| 142 | -12.9462 | -26.2585 | -17.6751 | -19.764  | -18.8194 | -24.9836 | -14.0216 |
| 143 | -13.1709 | -28.3538 | -21.8433 | -19.7651 | -16.7534 | -32.0705 | -15.062  |
| 144 |          | -27.2797 | -29.8216 | -20.2722 | -15.6184 | -31.059  | -16.6692 |
| 144 | -13.8936 |          |          |          |          |          |          |
| 145 | -15.1829 | -24.9396 | -31.7563 | -21.2734 | -15.161  | -25.7983 | -19.029  |
| 146 | -17.1844 | -23.1644 | -23.6245 | -22.6815 | -15.2817 | -23.032  | -22.5322 |
| 147 |          | -22.1949 | -19.9362 | -24.1401 | -15.9613 | -21.6786 | -28.0065 |
| 147 | -20.174  |          |          |          |          |          |          |
| 148 | -24.4805 | -22.0045 | -17.9918 | -24.8234 | -17.2402 | -21.2541 | -32.8401 |
| 149 | -27.6162 | -22.6242 | -17.0704 | -24.2051 | -19.2146 | -21.5419 | -27.7488 |
| 150 |          | -24.2351 | -16.9208 | -22.9564 | -21.9864 | -22.3808 | -24.0914 |
| 150 | -24.385  |          |          |          |          |          |          |
| 151 | -21.0596 | -27.3664 | -17.466  | -21.8711 | -25.1493 | -23.4703 | -22.2474 |
| 152 | -19.0869 | -33.6739 | -18.7244 | -21.2802 | -26.0915 | -24.1456 | -21.5623 |
| 153 |          | -36.2982 | -20.7652 | -21.2997 | -23.9978 | -23.7319 | -21.7726 |
| 153 | -18.1451 |          |          |          |          |          |          |
| 154 | -18.0446 | -28.0138 | -23.4886 | -22.0255 | -21.8952 | -22.5158 | -22.7664 |
| 155 | -18.7468 | -23.6617 | -25.4707 | -23.6372 | -20.667  | -21.2661 | -24.3628 |
| 156 |          | -21.0956 | -24.2851 | -26.5236 | -20.3102 | -20.4095 | -25.7797 |
| 156 | -20.3422 |          |          |          |          |          |          |
| 157 | -23.0544 | -19.5645 | -21.8786 | -31.3082 | -20.8002 | -20.0963 | -25.4487 |
| 158 | -26.8389 | -18.7825 | -20.0861 | -33.1169 | -22.2182 | -20.4014 | -23.568  |
| 159 |          | -18.6321 | -19.1315 | -27.6772 | -24.7784 | -21.425  | -21.6652 |
| 159 | -27.8324 |          |          |          |          |          |          |
| 160 | -24.2312 | -19.0803 | -18.974  | -23.8185 | -28.4507 | -23.3598 | -20.3438 |
| 161 | -21.2046 | -20.1523 | -19.6262 | -21.449  | -29.4546 | -26.5434 | -19.6925 |
| 162 |          | -21.9207 | -21.2296 | -20.0421 | -25.7888 | -30.6415 | -19.72   |
| 162 | -19.3739 |          |          |          |          |          |          |
| 163 | -18.4962 | -24.4513 | -24.1923 | -19.3391 | -22.6688 | -29.6826 | -20.4748 |
| 164 | -18.4393 | -27.3957 | -29.6535 | -19.2013 | -20.7574 | -25.4347 | -22.0999 |
| 165 |          | -28.7192 | -35.1812 | -19.5303 | -19.8087 | -22.4354 | -24.9137 |
| 165 | -19.2019 |          |          |          |          |          |          |
| 166 | -20.9368 | -27.283  | -27.8709 | -20.2089 | -19.6851 | -20.5618 | -29.3502 |
| 167 | -24.1116 | -25.5599 | -23.5639 | -21.0347 | -20.3788 | -19.4828 | -31.7017 |
| 168 |          | -24.6719 | -21.312  | -21.6871 | -22.0279 | -18.9929 | -27.2    |

168 -30.3729  
169 -42.3629 -24.7395 -20.2952 -21.8793 -25.0436 -18.9404 -23.5685  
170 -28.8381 -25.7518 -20.2436 -21.6461 -30.5799 -19.1671 -21.3566  
171 -27.5099 -21.1325 -21.3066 -36.0039 -19.4737 -20.0853  
171 -24.1657  
172 -21.9726 -28.6567 -23.1631 -21.1644 -28.6563 -19.6442 -19.4627  
173 -21.1462 -27.0672 -27.0283 -21.3754 -24.3443 -19.56 -19.2773  
174 -21.3999 -24.301 -35.8421 -21.9465 -22.0067 -19.2907 -19.3149  
175 -22.7744 -22.0608 -36.2734 -22.6857 -20.7682 -19.0236 -19.337  
176 -25.6942 -20.6121 -27.5416 -23.1155 -20.2356 -18.9301 -19.1536  
177 -19.914 -23.8876 -22.7341 -20.1316 -19.1003 -18.7447  
177 -31.8847  
178 -48.3472  
178 -19.9429 -22.0557 -21.6699 -20.1603 -19.5257 -18.2601  
179 -29.9328 -20.7531 -21.2811 -20.501 -20.0118 -20.0717 -17.8897  
180 -25.0257 -22.5357 -21.2217 -19.6413 -19.5305 -20.4568 -17.7663
